# 1      **Developmental Recovery of Impaired Multisensory Processing in** 2      **Autism and the Cost of Switching Sensory Modality**

3                      Michael J. Crosse<sup>1,2,\*</sup>, John J. Foxe<sup>1,2,3</sup> and Sophie Molholm<sup>1,2,3</sup>

4      <sup>1</sup>*The Cognitive Neurophysiology Laboratory, Department of Pediatrics, Albert Einstein College of Medicine, Montefiore Medical*  
5                      *Center, Bronx, NY 10461, USA*

6      <sup>2</sup>*The Dominick P. Purpura Department of Neuroscience, Rose F. Kennedy Intellectual and Developmental Disabilities Research*  
7                      *Center, Albert Einstein College of Medicine, Bronx, NY 10461, USA*

8      <sup>3</sup>*The Cognitive Neurophysiology Laboratory, Department of Neuroscience, The Ernest J. Del Monte Institute for Neuroscience,*  
9                      *University of Rochester School of Medicine and Dentistry, Rochester, NY 14642, USA*

---

## 11      **Abstract**

12      Children with autism spectrum disorder (ASD) are often impaired in their ability to cope with and process  
13      multisensory information, which may contribute to some of the social and communicative deficits that  
14      are prevalent in this population. Amelioration of such deficits in adolescence has been observed for  
15      ecologically-relevant stimuli such as speech. However, it is not yet known if this recovery generalizes to  
16      the processing of nonsocial stimuli such as more basic beeps and flashes, typically used in cognitive  
17      neuroscience research. We hypothesize that engagement of different neural processes and lack of  
18      environmental exposure to such artificial stimuli leads to protracted developmental trajectories in both  
19      neurotypical (NT) individuals and individuals with ASD, thus delaying the age at which we observe this  
20      “catch up”. Here, we test this hypothesis using a bisensory detection task by measuring human response  
21      times to randomly presented auditory, visual and audiovisual stimuli. By measuring the behavioral gain  
22      afforded by an audiovisual signal, we show that the multisensory deficit previously reported in children  
23      with ASD recovers in adulthood by the mid-twenties. In addition, we examine the effects of switching  
24      between sensory modalities and show that teenagers with ASD incur less of a behavioral cost than their  
25      NT peers. Computational modelling reveals that multisensory information interacts according to different  
26      rules in children and adults, and that sensory evidence is weighted differently too. In ASD, weighting of  
27      sensory information and allocation of attention during multisensory processing differs to that of NT  
28      individuals. Based on our findings, we propose a theoretical framework of multisensory development in  
29      NT and ASD individuals.

30      **Keywords:** bisensory detection, audiovisual integration, reaction time, redundant signals effect, race  
31      model, neurodevelopmental disorder, ASD.

---

\*Corresponding author

Email addresses: [michael.crosse@einstein.yu.edu](mailto:michael.crosse@einstein.yu.edu) (MJC), [john\\_foxe@urmc.rochester.edu](mailto:john_foxe@urmc.rochester.edu) (JJF), [sophie.molholm@einstein.yu.edu](mailto:sophie.molholm@einstein.yu.edu) (SM)

## 32 **Introduction**

33 Biological events tend to be multisensory, emanating or reflecting multiple forms of energy (e.g. photons,  
34 airborne vibrations, volatilized molecules, etc.). Humans have evolved a highly-specialized set of sensory  
35 receptors that enable us to sample these different forms of energy concurrently, optimizing how we  
36 perceive ecologically-relevant information. For instance, processing redundant multisensory signals often  
37 leads to faster reaction times (RTs) than processing the same information separately, a phenomenon  
38 known as the *redundant signals effect* (RSE; Todd, 1912; Hershenson, 1962; Kinchla, 1974). While a *race*  
39 *model* account of the RSE predicts that a response is triggered independently by the faster modality (Raab,  
40 1962), the RSE typically exceeds the benefit predicted by statistical facilitation (Miller, 1982). Violation of  
41 the race model has been demonstrated using bisensory detection tasks for several decades and is widely  
42 interpreted as reflecting the multisensory gain due to pooled or integrated information processing (Gielen  
43 et al., 1983; Miller, 1986; Diederich and Colonius, 1987; Harrington and Peck, 1998; Molholm et al., 2002;  
44 Murray et al., 2004; Mégevand et al., 2013; Mahoney et al., 2015).

45 Whereas multisensory processing clearly influences how we perceive most biological events, particularly  
46 in instances when sensory evidence is ambiguous (Sumbly and Pollack, 1954; Ross et al., 2007; Crosse et  
47 al., 2016), individuals with autism spectrum disorder (ASD) often do not benefit from the availability of  
48 multisensory information to the same extent as their neurotypical (NT) peers (de Gelder et al., 1991; Smith  
49 and Bennetto, 2007; Silverman et al., 2010; Irwin et al., 2011; Bebko et al., 2014; Foxe et al., 2015). We  
50 and others have suggested that impaired multisensory processing in ASD contributes to some of the  
51 commonly associated phenotypes such as atypical responses to sensory stimulation, and may even have  
52 detrimental effects on higher-order processes such as social interaction and communication (Ayres and  
53 Tickle, 1980; Martineau et al., 1992; Iarocci and McDonald, 2006; Foxe and Molholm, 2009; Beker et al.,  
54 2017; Stevenson et al., 2017).

55 In previous work by our lab, we demonstrated that multisensory gain increases steadily over the course  
56 of development for both speeded audiovisual (AV) detection (Brandwein et al., 2011) and AV speech  
57 identification (Ross et al., 2011). This is supported by animal neurophysiology that has shown that the  
58 ability to integrate multiple sensory inputs emerges with exposure to multisensory experiences (Wallace  
59 et al., 2004; Wallace and Stein, 2007; Stein et al., 2014). Whereas multisensory processing was significantly  
60 impaired in children with ASD for both of these tasks (Brandwein et al., 2013; Foxe et al., 2015), we and  
61 others have shown that neurotypical levels of AV speech integration are achieved by the time that  
62 individuals with ASD reach adolescence (Taylor et al., 2010; Foxe et al., 2015). In contrast, high-functioning  
63 teenagers with ASD failed to show reliable multisensory gain when performing a simple AV detection task  
64 (Brandwein et al., 2013). Recent theoretical (Beker et al., 2017) and computational (Cuppini et al., 2017)  
65 perspectives have suggested that the constant exposure to AV speech during maturation may serve to  
66 train multisensory speech function, leading to earlier developmental recovery of function in ASD. In  
67 support of this, the trajectory of multisensory development in typically-developing individuals reaches full  
68 maturity much earlier for speech stimuli (Ross et al., 2011) compared to non-speech stimuli (Brandwein  
69 et al., 2011). Here, using the same AV detection task, we tested the hypothesis that recovery of  
70 multisensory function in ASD occurs at a later developmental stage for nonsocial stimuli.

71 When switching from one sensory modality to another, average response times are slower on trials  
72 preceded by a different sensory modality (switch trials) compared to trials preceded by the same modality  
73 (repeat trials; Wundt, 1893; Sutton et al., 1961; Spence et al., 2001). Modality switch effects (MSEs) are  
74 inherent to any bisensory detection task that uses an intermixed stimulus presentation design (Gondan  
75 and Minakata, 2016; Otto and Mamassian, 2017) and have been shown to systematically contribute to  
76 the RSE because they are typically larger on unisensory trials than on multisensory trials (Gondan et al.,  
77 2004; Van der Stoep et al., 2015a; Shaw et al., 2019). Moreover, data suggest that children with high-  
78 functioning ASD incur a greater cost when switching from auditory to visual stimuli than their NT peers

79 (Williams et al., 2013). We therefore considered group differences in MSEs and quantified their  
80 contribution to the RSE. Using a computational modelling framework (Otto and Mamassian, 2012), we  
81 investigated how attentional resources were spread across sensory channels during speeded bisensory  
82 detection, and considered how this in turn could impact MSEs. We discuss the implications of MSEs on  
83 the interpretation of the RSE, and how the interplay between multisensory integration and switch effects  
84 may contribute differentially over the course of development in NT and ASD individuals.

85 Recent studies have demonstrated that multisensory behavior in NT adults can be explained by the basic  
86 cognitive architecture of the race model (Otto and Mamassian, 2012; Otto et al., 2013; Innes and Otto,  
87 2019). However, it is not yet known if the same cognitive architecture applies to multisensory processing  
88 in children and individuals with ASD, or whether they employ an alternative processing strategy and  
89 integrate multisensory inputs according to different rules. To test this, we examined whether the race  
90 model framework could be used to predict empirical multisensory benefits in each group. This modelling  
91 approach was also used to quantify developmental changes in sensory dominance. Based on our empirical  
92 findings and computational analysis, we propose a theoretical framework to explain the maturational  
93 patterns of multisensory processing in NT and ASD individuals.

## 94 **Methods**

95 The present study is based on new analyses of a large body of data collected as part of several previously  
96 published studies (Brandwein et al., 2011; Brandwein et al., 2013; Brandwein et al., 2015), as well as new  
97 unpublished data.

## 98 **Participants**

99 A total of 400 individuals participated in the experiment. The data of 42 participants (10.5% of the total  
100 sample, 29 ASD) were excluded from all analyses based on the following criteria: 1) they did not fall within  
101 the desired age range of 6–40 years, 2) their performance IQ was below 80, 3) their detection accuracy

102 was less than 3 SDs below the sample's mean, 4) they had an excessive number of false alarms, 5) they  
103 had a disproportionate number of misses on visual trials (excessive eye-closure) or on audio trials (not  
104 listening), or 6) they had less than 20 RTs per condition (this can bias median RT estimates (Miller, 1988,  
105 1991) as well as race model estimates (Kiesel et al., 2007)). Of the remaining 358 participants, 225 met  
106 criteria for NT (age range: 6–36 years; 115 females) and 133 had a diagnosis of ASD (age range: 6–39 years;  
107 34 females). For analysis purposes, age was either treated as a continuous variable or participants were  
108 cross-sectioned into four developmental subgroups: children (6–9 years), pre-adolescents (10–12 years),  
109 adolescents (13–17 years), adults (18–40 years). Mean age was not statistically different between NT and  
110 ASD participants in any of the four age groups ( $t < 0.91$ ,  $p > 0.38$ ,  $d < 0.21$ ). Participant demographics are  
111 presented in Table 1.

112 Individuals were excluded from participating in the experiment if they had a history of seizures or head  
113 trauma, or a known genetic disorder. Additionally, NT participants were excluded if they had a history of  
114 psychiatric, educational, attentional or other developmental difficulties (as assessed by a history  
115 questionnaire), a biological first-degree relative with a known developmental disorder, or if they or their  
116 legal guardians endorsed six or more items of inattention or hyperactivity on a DSM-IV checklist for  
117 attention deficit disorder. For the vast majority of participants, diagnoses of ASD were obtained by a  
118 trained clinical psychologist using the Autism Diagnostic Interview-Revised (Lord et al., 1994) and the  
119 Autism Diagnostic Observation Schedule (ADOS; Lord et al., 2000). Diagnoses of the remaining individuals  
120 were made by a licensed clinical psychologist external to this study using the Diagnostic Criteria for Autistic  
121 Disorder from the DSM-IV TR (APA, 2000). For more details regarding sub-phenotyping, medication and  
122 ethnic demographics, please refer to Brandwein et al. (2013) and Brandwein et al. (2015).

123 IQ quotients for performance (PIQ), verbal (VIQ) and full-scale (FSIQ) intelligence were assessed in the  
124 majority of participants using the Wechsler Abbreviated Scales of Intelligence (WASI; Stano, 1999). Note

125 that mean PIQ was not statistically different between NT and ASD participants in any of the four age  
 126 groups ( $t < 1.2$ ,  $p > 0.23$ ,  $d < 0.27$ ). The descriptive statistics for each of the subgroups are summarized in  
 127 Table 1. Participants were formally screened for normal or corrected-to-normal vision using a Snellen eye  
 128 test chart and audiometric threshold evaluation confirmed that all participants had within-normal-limits  
 129 hearing. All procedures were approved by the institutional review boards of the City College of New York  
 130 and the Albert Einstein College of Medicine. All participants or legal guardians of participants provided  
 131 written informed consent in accordance with the tenets of the 1964 Declaration of Helsinki.

132 **Table 1.** Demographic characteristics of participant populations.

|                             | NT           |              |              |              | ASD          |              |              |              |
|-----------------------------|--------------|--------------|--------------|--------------|--------------|--------------|--------------|--------------|
|                             | 6–9 yrs      | 10–12 yrs    | 13–17 yrs    | 18–40 yrs    | 6–9 yrs      | 10–12 yrs    | 13–17 yrs    | 18–40 yrs    |
| <i>n</i>                    | 51           | 46           | 54           | 74           | 44           | 34           | 31           | 23           |
| <i>n</i> <sub>female</sub>  | 27           | 26           | 24           | 38           | 7            | 6            | 10           | 11           |
| <i>n</i> <sub>IQ</sub>      | 45           | 43           | 48           | 10           | 44           | 33           | 30           | 21           |
| Age                         | 8.1 (1.2)    | 11.5 (1.0)   | 15.0 (1.3)   | 25.3 (3.6)   | 8.1 (1.0)    | 11.4 (0.7)   | 14.7 (1.6)   | 25.8 (5.1)   |
| <i>F</i> <sub>1</sub> score | 0.90 (0.07)  | 0.93 (0.06)  | 0.95 (0.04)  | 0.97 (0.02)  | 0.85 (0.08)  | 0.87 (0.08)  | 0.92 (0.07)  | 0.95 (0.04)  |
| PIQ                         | 106.1 (13.0) | 109.7 (10.7) | 104.9 (13.3) | 109.9 (12.3) | 106.2 (17.1) | 106.6 (16.2) | 107.9 (13.2) | 108.5 (13.9) |
| VIQ                         | 113.0 (10.6) | 111.8 (13.0) | 113.1 (12.8) | 115.1 (16.1) | 97.3 (19.8)  | 99.4 (19.1)  | 99.9 (18.8)  | 109.3 (15.8) |
| FSIQ                        | 111.4 (11.5) | 112.2 (11.7) | 110.1 (12.5) | 114.5 (14.0) | 101.7 (17.5) | 102.8 (17.4) | 104.1 (14.1) | 110.0 (14.4) |
| ADOS                        | –            | –            | –            | –            | 7.3 (2.3)    | 8.0 (0.9)    | 6.9 (3.3)    | –            |

133 Note: *n*<sub>female</sub> indicates the number of female participants in respective age groups and *n*<sub>IQ</sub> indicates the  
 134 number of participants for whom IQ scores were obtained. The number of participants for whom ADOS  
 135 scores were obtained is 31, 19, 7 respectively. PIQ: performance IQ; VIQ: verbal IQ; FSIQ: full-scale IQ  
 136 (assessed using the WASI). *F*<sub>1</sub> scores indicate participants' detection accuracy, accounting for false alarms  
 137 (see Methods for details). Values indicate the group mean with standard deviation shown in parentheses.

### 138 Stimuli and procedure

139 The stimulus materials were identical to those described in Brandwein et al. (2011). In brief, visual (V)  
 140 stimuli consisted of a red disc (diameter: 3.2 cm; duration: 60 ms), located 0.4 cm above a central fixation

141 crosshair on a black background. The disc subtended visual angles of 1.5° vertically and horizontally and  
142 the bottom of the disc subtended 0.9° vertically above the crosshair (Fig. 1A). Auditory (A) stimuli  
143 consisted of a 1-kHz pure tone, sampled at 44.1 kHz (duration: 60 ms; rise/fall time: 5 ms). Audiovisual  
144 (AV) stimuli consisted of the combined simultaneous pairing of the auditory and visual stimuli described  
145 above.

146 Participants performed a speeded bisensory detection task on a computer and were seated 122 cm from  
147 the visual display in a dimly-lit, sound-attenuated booth. RTs were recorded during the simultaneous  
148 recording of electrophysiological (EEG) data, however, the EEG data are not reported in this study (for an  
149 account of previous EEG analyses, please refer to Brandwein et al., 2011; Brandwein et al., 2013;  
150 Brandwein et al., 2015). To reduce predictability, the stimuli were presented in a completely randomized  
151 order with equal probability and the interstimulus interval (ISI) was randomly jittered between 1000–3000  
152 ms according to a uniform, square-wave distribution (see Fig. 1A). Stimulus presentation was controlled  
153 using Presentation® software (Neurobehavioral Systems, Inc., Berkeley, CA). Auditory stimuli were  
154 delivered binaurally at an intensity of 75 dB SPL via a single, centrally-located loudspeaker (JBL Duet  
155 Speaker System, Harman Multimedia). Visual stimuli were presented at a resolution of 1280 × 1024 pixels  
156 on a 17-inch Flat Panel LCD monitor (Dell Ultrasharp 1704FTP). The auditory and visual stimuli were  
157 presented in close spatial proximity, with the speaker placed atop the monitor and aligned vertically to  
158 the visual stimulus. Participants were instructed to press a button on a response pad (Logitech Wingman  
159 Precision Gamepad) with their right thumb as soon as they perceived any of the three stimuli. Analogue  
160 triggers indicating the latencies of stimulus onsets and button presses were sent to the acquisition PC via  
161 Presentation® and stored digitally at a sampling rate of 512 Hz in a separate channel of the EEG data file  
162 using ActiView software (BioSemi™, Amsterdam, The Netherlands). Stimuli were presented in blocks of  
163 ~100 trials and participants typically completed 6–10 blocks in total.

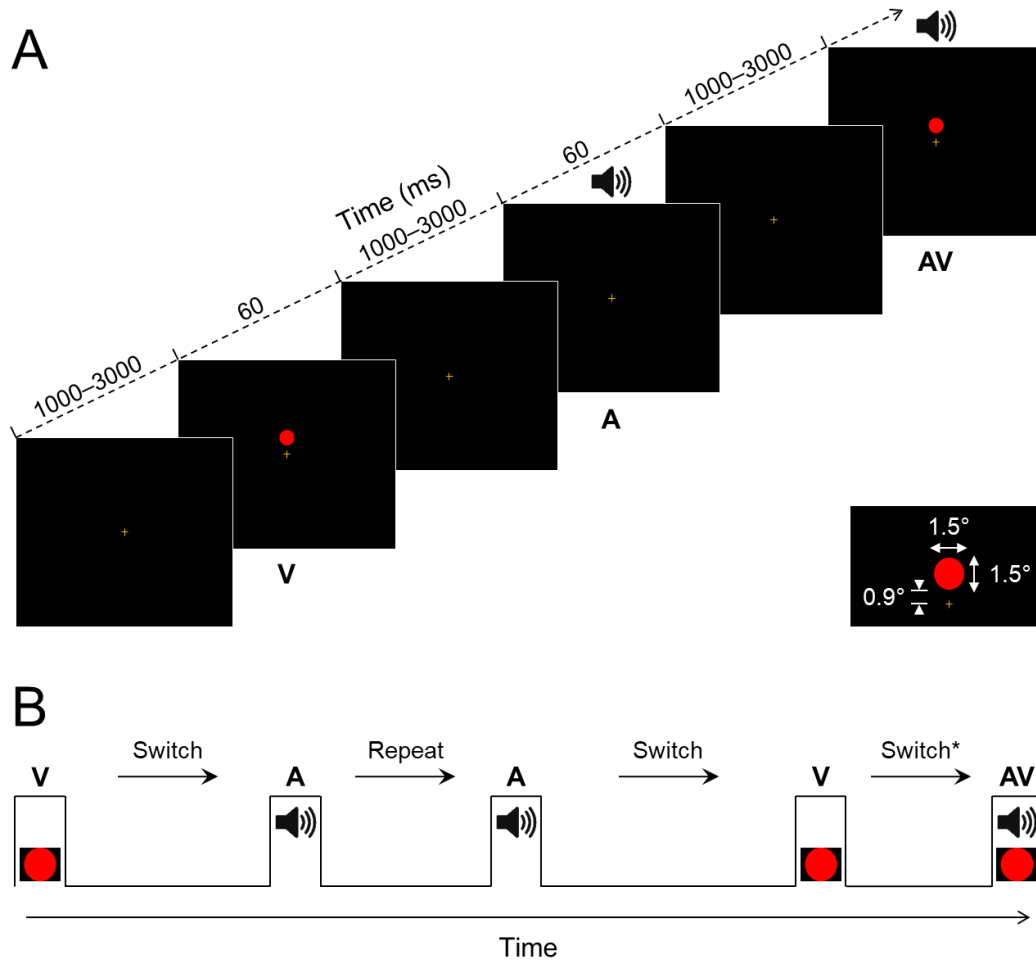

164

165 **Figure 1.** Bisensory detection task. **A**, Auditory (A), visual (V) and audiovisual (AV) stimuli (60-ms duration)

166 were presented in a randomized order every 1000–3000 ms. Participants responded to each stimulus with

167 a button press as fast as possible. **B**, Stimuli were categorized as either switch or repeat trials based on

168 the modality of the preceding stimulus (repeat trials: AV→AV, A→A, V→V; switch trials: V→AV\*, A→AV\*,

169 A→V, V→A). Asterisks indicate trials that are only partial switches. Trials AV→A and AV→V were excluded

170 from the analysis as they were considered neither switches nor repeats.

### 171 **Data analysis**

172 Detection accuracy was assessed in order to identify participants that did not attend adequately to the

173 stimuli. To account for false alarms and excessive button pressing,  $F_1$  scores were computed as the

174 harmonic mean of precision and recall (Van Rijsbergen, 1979):



175 
$$F_1 = 2 \times \frac{\text{precision} \times \text{recall}}{\text{precision} + \text{recall}} \quad (1)$$

176 where precision = hits/(hits + false alarms) and recall = hits/(hits + misses). Responses were considered as  
177 false alarms if they occurred earlier than 100 ms post stimulus onset, or if they occurred after another  
178 response but before the next stimulus. Responses were considered as misses if they occurred later than  
179 2000 ms post stimulus onset, or if there was no response at all to a given stimulus.

180 Response times were measured relative to the onset time of the preceding stimulus and analyzed  
181 separately for each participant in MATLAB (The MathWorks, Inc., Natick, MA). Responses were excluded  
182 from all analyses if there was more than one response within a given trial (double-presses), they occurred  
183 within the first 3 trials of a block (considered training) or the preceding ISI was not between 1000–3000  
184 ms (due to system errors). An outlier correction procedure was performed before the main RT analyses.  
185 First, RTs that did not fall within 100–2000 ms post-stimulus were removed. On average, fast outliers  
186 (<100 ms, considered anticipatory responses) made up 0.7% ( $\pm 0.9$ ) of trials and slow outliers (>2000 ms,  
187 considered misses) made up 0.4% ( $\pm 0.6$ ) of trials. Second, RTs outside the middle 95<sup>th</sup> percentile (2.5–  
188 97.5) of their respective conditions were removed. While not all RTs outside of this range are necessarily  
189 outliers, those within this range are most likely to come from the cognitive processes under consideration  
190 (Ratcliff, 1993). This approach minimizes the impact of outliers with only negligible truncation biases  
191 (Ulrich and Miller, 1994) and captures the range of RTs at an individual-participant level, an important  
192 factor when dealing with significant inter-subject variability.

193 Analysis of RT data was conducted on the whole RT distribution by splitting it into discrete quantiles  
194 (Ratcliff, 1979). RTs were organized into 20 linearly-spaced quantiles between the 2.5–97.5 cutoffs used  
195 for outlier correction. Because outlier correction was performed separately for each condition, the lowest  
196 2.5 and highest 97.5 percentiles were used for all three conditions in order to maintain the relationship  
197 between them. Cumulative distribution functions (CDFs) were obtained by calculating the cumulative

198 probability of RTs occurring below time  $t$  given a signal  $X$ ,  $P(RT_X \leq t|X)$ . CDFs were averaged or  
199 “Vincentized” across participants at each corresponding quantile (Vincent, 1912). Note, this approach  
200 does not require there to be an equal number of RTs in each condition (Ulrich et al., 2007).

### 201 **Race model analysis**

202 To obtain quantitative predictions of statistical facilitation, we used Raab’s race model (Raab, 1962). Race  
203 models predict that the response to a redundant signal is triggered by the faster of the two sensory  
204 modalities. Let  $P(RT_A \leq t|AV)$  and  $P(RT_V \leq t|AV)$  represent the CDFs of the A and V components of an AV  
205 stimulus, respectively. Assuming the RT distributions of the A and V components overlap, the probability  
206 of either triggering a response can be represented using probability summation:

$$207 \quad P(RT_{AUV} \leq t|AV) = P(RT_A \leq t|AV) + P(RT_V \leq t|AV) - P(RT_{A \cap V} \leq t|AV) \quad (2)$$

208 where  $P(RT_{A \cap V} \leq t|AV)$  is the probability of the A and V signals triggering a response at the same time. To  
209 solve this analytically, we need to make two assumptions: 1) RTs to the A and V components of the AV  
210 signal follow the same distributions as the RTs to the unisensory A and V signals, such that  $P(RT_A \leq t|AV)$   
211  $= P(RT_A \leq t|A)$  and  $P(RT_V \leq t|AV) = P(RT_V \leq t|V)$ , an assumption known as context invariance (Ashby and  
212 Townsend, 1986; Luce, 1986; Miller, 2016); 2) RTs to the A and V components of the AV signal are  
213 statistically independent, such that their joint probability  $P(RT_{A \cap V} \leq t|AV)$  can be calculated by the product  
214 of  $P(RT_A \leq t|AV)$  and  $P(RT_V \leq t|AV)$  (Meijers and Eijkman, 1977). Simplifying  $P(RT_{AUV} \leq t|AV)$  to  $F_{AUV}(t)$ ,  $P(RT_A$   
215  $\leq t|A)$  to  $F_A(t)$  and  $P(RT_V \leq t|V)$  to  $F_V(t)$ , equation 2 can be represented as:

$$216 \quad F_{AUV}(t) = F_A(t) + F_V(t) - F_A(t) \times F_V(t) \quad (3)$$

217 Note, the joint probability term is often omitted from equation 3 to produce an upper bound known as  
218 Miller’s bound or the race model inequality (Miller, 1982), as the assumption of statistical independence  
219 is poorly motivated; it is likely that responses to signals on different channels compete for resources

220 (Miller, 1978, 1982; Colonius, 1986, 1990; Gondan and Minakata, 2016). Assuming that the allocation of  
221 attentional resources to each channel is partially determined by the modality of the previous trial (Miller,  
222 1982), we separated the unisensory RTs by their preceding sensory modality and computed individual  
223 race models before averaging across them:

$$224 \quad \bar{F}_{AUV}(t) = \frac{1}{3} \sum_{m=1}^3 F_{AUV}(m, t) \quad (4)$$

225 where  $m$  is the preceding modality. This approach captured some of the dependency between RTs to  
226 signals on different channels, resulting in an estimate of statistical facilitation that was less conservative  
227 at every quantile ( $p < 0.025$ , two-tailed permutation tests). Note that using Raab's model or Miller's bound  
228 typically yields the same outcome qualitatively (Van der Stoep et al., 2015b; Van der Stoep et al., 2015a).

229 Multisensory benefits were quantified by the area between the CDFs in the multisensory condition and  
230 the most effective unisensory condition (Otto et al., 2013). First, we computed the multisensory benefit  
231 predicted by the race model (Fig. 2B, left):

$$232 \quad \text{benefit}_{\text{pred}} = \int_0^1 \bar{F}_{AUV}(t) - \max[F_A(t), F_V(t)] dt \quad (5)$$

233 where the integral is taken over every quantile  $t$  from 0 to 1. The term  $\max[F_A(t), F_V(t)]$  represents a lower  
234 bound of facilitation, known as Grice's bound (Grice et al., 1984), whereby no statistical benefit is  
235 observed for a redundant signal at any quantile. Similarly, we computed empirical benefits based on the  
236 actual multisensory RTs (Fig. 2B, right):

$$237 \quad \text{benefit}_{\text{emp}} = \int_0^1 F_{AV}(t) - \max[F_A(t), F_V(t)] dt \quad (6)$$

238 Note that this is not the same as measuring multisensory interactions since Grice's bound does not  
239 account for statistical facilitation (see Innes and Otto, 2019). Rather, it quantifies the benefit afforded by  
240 a redundant signal relative to that of the most effective unisensory signal.

241 To determine whether the empirical multisensory benefits exceeded statistical facilitation, we computed  
242 the difference between the CDFs of the multisensory condition and the race model at every quantile  
243 (Molholm et al., 2002). Positive values indicate quantiles where multisensory RTs were faster than  
244 predicted, i.e., violation of the race model. To obtain an overall index of multisensory gain, we calculated  
245 the area under the curve (AUC) by taking the integral over every quantile as before (Fig. 4A):

$$246 \quad \text{gain} = \int_0^1 F_{AV}(t) - \bar{F}_{AUV}(t) dt \quad (7)$$

247 While it is common practice to interpret the AUC above zero as an index of multisensory interactions  
248 (Miller, 1986; Nozawa et al., 1994; Hughes et al., 1998), equation 6 is equal to the AUC above zero minus  
249 the AUC below zero (Colonius and Diederich, 2006; Krueger Fister et al., 2016). This is mathematically  
250 equivalent to the difference between predicted benefits (Eq. 5) and empirical benefits (Eq. 6) and  
251 represents the overall behavioral gain across the participant's entire RT distribution. Qualitatively, this is  
252 equivalent to using only the positive portion (e.g., Nidiffer et al., 2016), because the AUC below the x-axis  
253 is negatively correlated with the AUC above the x-axis (see Fig. 4B). Moreover, the majority of younger  
254 participants in this study did not exceed statistical facilitation, rendering a statistical analysis based on the  
255 positive AUC less powerful. All race model analyses were conducted using the RaceModel open-source  
256 toolbox (<https://github.com/mickcrosse/RaceModel>).

### 257 **Modality switch effects**

258 When testing the race model, randomly interleaving sensory modalities is necessary to minimize the  
259 opportunity for different processing strategies to be deployed under unisensory and multisensory

260 conditions and hence satisfy the assumption of context invariance (Gondan and Minakata, 2016; Miller,  
261 2016; Otto and Mamassian, 2017). While modality switch effects are inherent to such task conditions,  
262 their size and contribution to processes such as the RSE are rarely if ever quantified. It has been suggested  
263 that reporting the size of MSEs should become a routine procedure in RSE studies and that failure to do  
264 so would render such studies incomplete (see Otto and Mamassian, 2017). Accordingly, we assessed MSEs  
265 in NT and ASD individuals and whether or not they were likely to account for the observed RSE.

266 To examine MSEs, RTs were separated into those preceded by the same modality (repeat trials) and those  
267 preceded by a different modality (switch trials). Unisensory trials preceded by multisensory trials (AV→A,  
268 AV→V) were excluded from this analysis as they were considered neither switches nor repeats (repeat  
269 trials: A→A, V→V, AV→AV; switch trials: V→A, A→V, V→AV, A→AV). Separate CDFs were obtained for  
270 switch and repeat trials within each condition. The CDFs of the two multisensory switch conditions (A→AV,  
271 V→AV) were averaged to produce one multisensory switch condition (V/A→AV). MSEs were quantified  
272 by the area between the CDFs of the switch and repeat trials:

$$273 \quad \text{MSE} = \int_0^1 F_{\text{repeat}}(t) - F_{\text{switch}}(t) dt \quad (8)$$

274 To examine the impact of switching sensory modality on the observed multisensory gain, separate tests  
275 of the race model were performed for switch and repeat trials.

### 276 **Modelling channel dependency and RT variability**

277 It is widely considered that violation of the race model necessitates the rejection of its basic architecture  
278 in favor of the so-called coactivation model, whereby multisensory activity is pooled or integrated prior  
279 to the formation of a decision (Miller, 1982). Alternatively, sensory evidence could accumulate along  
280 separate channels that interact with one another, forming separate decisions that are then coupled by a  
281 task-relevant logical operation (Fig. 10; Mordkoff and Yantis, 1991; Townsend and Wenger, 2004; Otto

282 and Mamassian, 2017). Seminal work by Otto and Mamassian (2012) demonstrated that the basic race  
283 architecture can be used to explain empirical multisensory RT data by including two additional parameters  
284 to account for the additional variability or noise  $\eta$ , typically observed in empirical multisensory RTs  
285 compared to that predicted by probability summation, and the correlation  $\rho$  between RTs to signals on  
286 different sensory channels. Figure 6A illustrates the effect of trial history on the correlation between RTs  
287 on different channels as a function of RT quantile. Conceptually, Miller's and Grice's bounds assume a  
288 perfect negative and positive correlation respectively, whereas Raab's model assumes zero correlation  
289 (i.e., independence). Otto's context variant race model on the other hand makes no such assumptions,  
290 allowing the correlation parameter  $\rho$  to vary in a way that optimizes how the model predicts the empirical  
291 data.

292 Applying this modelling approach, we examined the values of  $\rho$  and  $\eta$  that optimized the model fit for  
293 each participant in order to gain additional insight into the cognitive processes underlying group  
294 differences in multisensory processing and modality switching. Using the RSE-box (v1.0) toolbox  
295 (<https://github.com/tomotto/RSE-box>; Otto, 2018), Gaussian functions were fit to the reciprocal of the  
296 unisensory RT distributions via the LATER model approach (Noorani and Carpenter, 2016), which assumes  
297 that the reciprocals of the RT distributions are normally distributed with mean  $\mu$  and SD  $\sigma$  (see Fig. 6B).  
298 These parameters were then used to generate the probability density function (PDF) of the maximum  
299 distribution  $f_{AUV}(x) = f_A(-x) + f_V(-x)$ , where

300 
$$f_A(x) = \frac{1}{\sigma_A + \eta} \varphi\left(\frac{x + \mu_A}{\sigma_A + \eta}\right) \times \Phi\left(\frac{\rho(x + \mu_A)}{(\sigma_A + \eta)\sqrt{1 - \rho^2}} - \frac{x + \mu_V}{(\sigma_V + \eta)\sqrt{1 - \rho^2}}\right) \quad (9)$$

301 where  $\varphi$  and  $\Phi$  are the PDF and CDF of the standard normal distribution, respectively. Calculation of  $f_V(x)$   
302 was obtained analogously to equation 9. A more detailed description can be found in Otto and Mamassian  
303 (2012), supplementary information.

304 **Predicting multisensory benefits**

305 While Raab's race model typically underestimates the amount of multisensory benefit observed in healthy  
306 adults, it has been shown to explain much of the variance in empirical benefits across participants and  
307 stimulus conditions (Otto et al., 2013; Innes and Otto, 2019). This provides further evidence that the race  
308 model could serve as a potential framework for the underlying cognitive architecture (Otto and  
309 Mamassian, 2017). We tested whether multisensory behavior in children and individuals with ASD follow  
310 the predictions of the race model or some alternative processing strategy. We proposed two alternative  
311 strategies to the race model: 1) multisensory responses are biased towards a specific modality, regardless  
312 of which is faster; 2) multisensory responses are biased towards the modality of the previous trial,  
313 regardless of which modality is faster. Model 1 could be biased towards either the auditory (Model 1A) or  
314 the visual (Model 1V) modality and can be expressed as follows:

315 
$$F_{1b}(t) = \frac{1}{3} \sum_{m=1}^3 F_b(m, t) \quad (10)$$

316 where  $m$  is the preceding modality (A, V, AV) and  $b$  is the modality that the system is biased towards (A  
317 or V). Model 2 was biased towards the previous modality, except on AV trials, where it was biased towards  
318 either the auditory (Model 2A) or the visual (Model 2V) modality:

319 
$$F_{2b}(t) = \frac{1}{3} (F_A(A, t) + F_V(V, t) + F_b(AV, t)) \quad (11)$$

320 Each model was used to obtain a new measure of predicted benefits and assessed based on how  
321 accurately it could predict empirical benefits. To examine any potential developmental transitions in  
322 processing strategy, we parametrically varied the probability of a response being triggered by a race  
323 strategy versus the above strategies as follows:

324 
$$\text{benefit}_{ib} = \int_0^1 (1 - p)\bar{F}_{AU\bar{V}}(t) + pF_{ib}(t) - \max[F_A(t), F_V(t)] dt, \quad \text{for } p = 0, 0.25, \dots, 1 \quad (12)$$

325 where  $F_{ib}(t)$  is the biased model and  $p$  is the probability of it triggering a response. When  $p = 0$ , the model  
326 constitutes a pure race model and when  $p = 1$ , the model constitutes a purely biased model.

### 327 **Statistical analyses**

328 As an initial inquiry, a linear mixed-effects model was used to determine which parameters influenced  
329 RTs. The model was fit using the maximum likelihood criterion. Single-trial RTs were the continuous  
330 numeric dependent variable. Diagnosis was a contrast-coded fixed factor (NT, ASD), age was a continuous  
331 numeric fixed factor (6–40 years), and condition was a multi-level nominal fixed factor (AV, A, V). Subjects  
332 were included as a random factor, along with by-subject slope adjustments for condition (Barr et al.,  
333 2013). ISI was included as another random factor, as well as preceding modality with slope adjustments  
334 for condition. Subsequent analyses employing standard linear models coded fixed effects as above. A one-  
335 way analysis of covariance (ANCOVA) was used to assess the correspondence between empirical and  
336 predicted benefits, treating age group as a partialled out categorical variable (Bland and Altman, 1995).

337 A mediation analysis (Baron and Kenny, 1986) was used to establish whether the relationship between  
338 participants' age and multisensory gain was mediated by a direct effect of age on MSE. Age was chosen  
339 as the causal variable in the model because of its known effect on race model violation (Brandwein et al.,  
340 2011). For this analysis, MSEs were averaged across the two unisensory conditions ( $V \rightarrow A$ ,  $A \rightarrow V$ ), as we  
341 hypothesized that it was a slowing of unisensory RTs that was the cause of the observed RSE. Using the  
342 M3 Toolbox (<https://github.com/canlab/MediationToolbox>), we constructed a three-variable mediation  
343 model with age as the causal variable, gain as the outcome variable and MSE as the mediating variable  
344 (Fig. 9C). For MSE to be considered a mediator, the following criteria must be met based on three separate  
345 regressions: 1) the causal variable must affect the outcome, 2) the causal variable must affect the



346 mediator, and 3) the mediator must affect the outcome but the causal variable must either no longer  
347 affect the outcome (full mediation) or at least weaken the effect (partial mediation). Significance and SE  
348 of the associated path coefficients were bootstrapped (10,000 samples) and adjusted using the bias-  
349 corrected and accelerated percentile method (Wager et al., 2008).

350 All *post hoc* statistical comparisons were conducted using nonparametric permutation tests (10,000  
351 permutations) based on the  $t$ -statistic and adjusted to control for family-wise error rate using the  $t_{max}$   
352 correction method (Westfall and Young, 1993; Blair et al., 1994). This method has been shown to control  
353 for Type 1 error at a desired level when performing tests of the race model at multiple quantiles and the  
354 power of the test is reasonable even for small samples (Gondan, 2010). Equivalence of variance was  
355 established prior to all unpaired tests using a permuted  $F$ -test and the appropriate  $t$ -statistic was then  
356 applied based on the outcome. Effect sizes were calculated using Cohen's  $d$  and were bias-corrected  
357 according to sample size (Hedges and Olkin, 1985). All confidence intervals (CIs) were bootstrapped  
358 (10,000 samples) at the 95% confidence level and adjusted using the bias-corrected and accelerated  
359 percentile method (Davison and Hinkley, 1997). Correlation analyses were conducted using permuted  
360 Pearson correlation or Spearman rank coefficients (Bishara and Hittner, 2012). All *post hoc* statistical tests  
361 and effect size calculations were conducted using the PERMUTOOLS open-source toolbox  
362 (<https://github.com/mickcrosse/PERMUTOOLS>).

## 363 **Results**

### 364 **Reaction times and multisensory benefits**

365 A linear mixed-effects analysis was used to examine the effect of diagnosis, age and stimulus condition on  
366 response times ( $R^2_{adj} = 0.495$ ). Subjects, ISI and preceding modality were included as random factors, along  
367 with slope adjustments for condition (see Methods for details). Participants with ASD responded more  
368 slowly to stimuli than their NT peers ( $\beta = 47.6$ ,  $SE = 12.3$ ,  $p = 0.0001$ ; Fig. 2A). There was an effect of

369 maturation, with older participants responding faster than younger participants ( $\beta = -9.1$ ,  $SE = 0.84$ ,  $p =$   
370  $2 \times 10^{-27}$ ). Responses to multisensory stimuli were faster than those to both audio ( $\beta = 55.2$ ,  $SE = 9.96$ ,  $p =$   
371  $3 \times 10^{-8}$ ) and visual ( $\beta = 67.1$ ,  $SE = 6.7$ ,  $p = 6 \times 10^{-24}$ ) stimuli, indicating the presence of an RSE. There was an  
372 interaction between age and RSE ( $RSE_A: \beta = -0.6$ ,  $SE = 0.22$ ,  $p = 0.006$ ;  $RSE_V: \beta = -0.48$ ,  $SE = 0.18$ ,  $p = 0.008$ ).

373 To examine the RSE in detail, a general linear model was constructed to quantify the effects of diagnosis  
374 and age on predicted ( $R^2_{adj} = 0.086$ ) and empirical benefits ( $R^2_{adj} = 0.255$ ). Predicted benefits decreased as  
375 a function of age ( $\beta = -0.07$ ,  $SE = 0.01$ ,  $p = 1 \times 10^{-7}$ ) and were not significantly different in NT and ASD  
376 individuals ( $\beta = 0.3$ ,  $SE = 0.2$ ,  $p = 0.12$ ). Conversely, empirical benefits increased with age ( $\beta = 0.18$ ,  $SE =$   
377  $0.02$ ,  $p = 2 \times 10^{-17}$ ) and were smaller in ASD individuals ( $\beta = -1.5$ ,  $SE = 0.3$ ,  $p = 7 \times 10^{-7}$ ). This suggests that  
378 the race model over-predicts empirical benefits for younger individuals and under-predicts them for older  
379 individuals (see Fig. 2C). Moreover, the race model does not predict the group differences in empirical  
380 multisensory benefits, suggesting an integrative deficit.

381

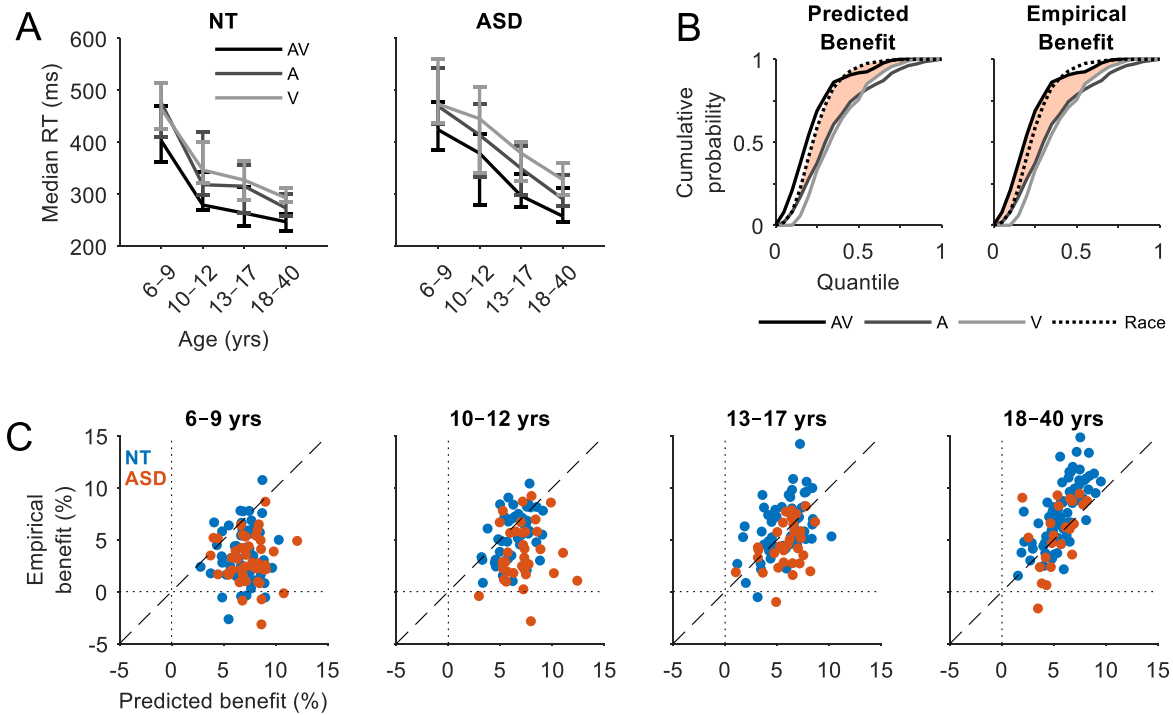

382

383 **Figure 2.** Reaction times and multisensory benefits. **A**, Group median RTs for NT (left panel) and ASD (right

384 panel) individuals as a function of age group. Error bars indicate 95% CIs (bootstrapped). **B**, RT cumulative

385 probability for each of the three stimulus conditions and the race model (Eq. 4). Predicted benefits (left

386 panel) are quantified by the area between the CDFs of the race model and the faster of the unisensory

387 conditions (Eq. 5). Empirical benefits (right panel) are quantified by the area between the CDFs of the

388 multisensory condition and the faster of the unisensory conditions (Eq. 6). Data from an example NT adult

389 participant. **C**, Predicted benefits versus empirical benefits by age group. Each datapoint represents an

390 individual participant (blue = NT, red = ASD).

### 391 **Testing the race model**

392 To determine whether the RSE exceeded statistical facilitation, we compared the multisensory CDFs to

393 the race model at each of the first 7 quantiles (maximum number of quantiles violated by any group).

394 Violation of the race model was assessed using right-tailed permutation tests with  $t_{\max}$  correction

395 (Gondan, 2010). NT participants showed evidence of violation at one or more quantiles in every age group,

396 the number of quantiles increasing as a function of age ( $p < 0.05$ , shaded area, Fig. 3A). The percentage  
 397 of participants that exceeded statistical facilitation at each quantile is illustrated in Figure S1. Individuals  
 398 with ASD showed no evidence of violation between the ages of 6–12 years (Fig. 3B). However, evidence  
 399 of violation emerges in adolescence (first quantile) and becomes more evident in adulthood (first 2  
 400 quantiles; see Table 2 for the statistics of each race model test). Note, these results were replicated  
 401 qualitatively using the more conservative Miller’s bound, albeit at less quantiles (see Table S1).

402 **Table 2.** Test statistics comparing CDFs of multisensory RTs with the race model. Values shown indicate  
 403 effect sizes (Cohen’s  $d$  corrected for sample size) and 95% CIs (bootstrapped) in brackets. Asterisks  
 404 indicate significant race model violation ( $p < 0.05$ , right-tailed permutation tests,  $t_{\max}$  corrected).

| Q | NT               |                  |                  |                | ASD              |                  |                  |                  |
|---|------------------|------------------|------------------|----------------|------------------|------------------|------------------|------------------|
|   | 6–9 yrs          | 10–12 yrs        | 13–17 yrs        | 18–40 yrs      | 6–9 yrs          | 10–12 yrs        | 13–17 yrs        | 18–40 yrs        |
| 1 | 0.18[0.1,0.3]*   | 0.44[0.3,0.7]*   | 0.54[0.4,0.9]*   | 0.83[0.6,1.1]* | 0.12[-0.0,0.3]   | 0.07[-0.1,0.3]   | 0.30[0.1,0.6]*   | 0.62[0.4,1.1]*   |
| 2 | -0.06[-0.2,0.1]  | 0.21[0.1,0.4]*   | 0.41[0.3,0.6]*   | 0.73[0.6,0.9]* | -0.14[-0.2,-0.0] | -0.06[-0.2,0.1]  | 0.09[-0.1,0.3]   | 0.38[0.2,0.6]*   |
| 3 | -0.21[-0.3,-0.1] | 0.03[-0.1,0.2]   | 0.29[0.2,0.4]*   | 0.59[0.4,0.8]* | -0.29[-0.4,-0.2] | -0.19[-0.3,-0.1] | -0.08[-0.3,0.1]  | 0.19[0.0,0.4]    |
| 4 | -0.35[-0.5,-0.2] | -0.11[-0.2,-0.0] | 0.17[0.1,0.3]*   | 0.44[0.3,0.6]* | -0.48[-0.7,-0.3] | -0.34[-0.6,-0.2] | -0.29[-0.6,-0.1] | 0.07[-0.1,0.3]   |
| 5 | -0.53[-0.8,-0.4] | -0.27[-0.4,-0.2] | 0.03[-0.1,0.2]   | 0.31[0.2,0.4]* | -0.66[-1.1,-0.5] | -0.50[-0.8,-0.3] | -0.54[-0.9,-0.3] | 0.01[-0.2,0.2]   |
| 6 | -0.80[-1.1,-0.6] | -0.43[-0.7,-0.3] | -0.09[-0.2,0.0]  | 0.21[0.1,0.3]* | -0.89[-1.4,-0.6] | -0.70[-1.2,-0.5] | -0.75[-1.3,-0.5] | -0.07[-0.3,0.1]  |
| 7 | -1.00[-1.4,-0.8] | -0.55[-0.8,-0.4] | -0.20[-0.4,-0.1] | 0.12[-0.0,0.2] | -1.12[-1.7,-0.8] | -0.75[-1.3,-0.6] | -0.97[-1.5,-0.6] | -0.17[-0.4,-0.0] |

405 To compare race model violation between NT and ASD individuals of different ages, we computed the  
 406 root-mean-square error (RMSE) and correlation coefficient between each participant’s violation function  
 407 and that of every other participant. Because the violation functions are typically non-normal, we applied  
 408 a rank-based inverse normal (RIN) transformation (Bliss, 1967), prior to assessing the Pearson correlation.  
 409 Participants were split into 8 age groups separated by 3 years between the ages of 6–30 years (there were  
 410 too few participants above 30 years of age). Matrices containing RMSE and correlation values were  
 411 obtained by averaging over the values within each age group (Fig. 3C). The red line in Figure 3C indicates  
 412 the age groups that are most similar, and its divergence above the dotted midline suggests that  
 413 multisensory behavior in ASD participants corresponded more closely to that of younger NT participants,

414 i.e., a developmental delay. Convergence of the red and dotted lines suggests that this delay may recover  
 415 in adulthood, in line with our original hypothesis. This is further examined in the following section.

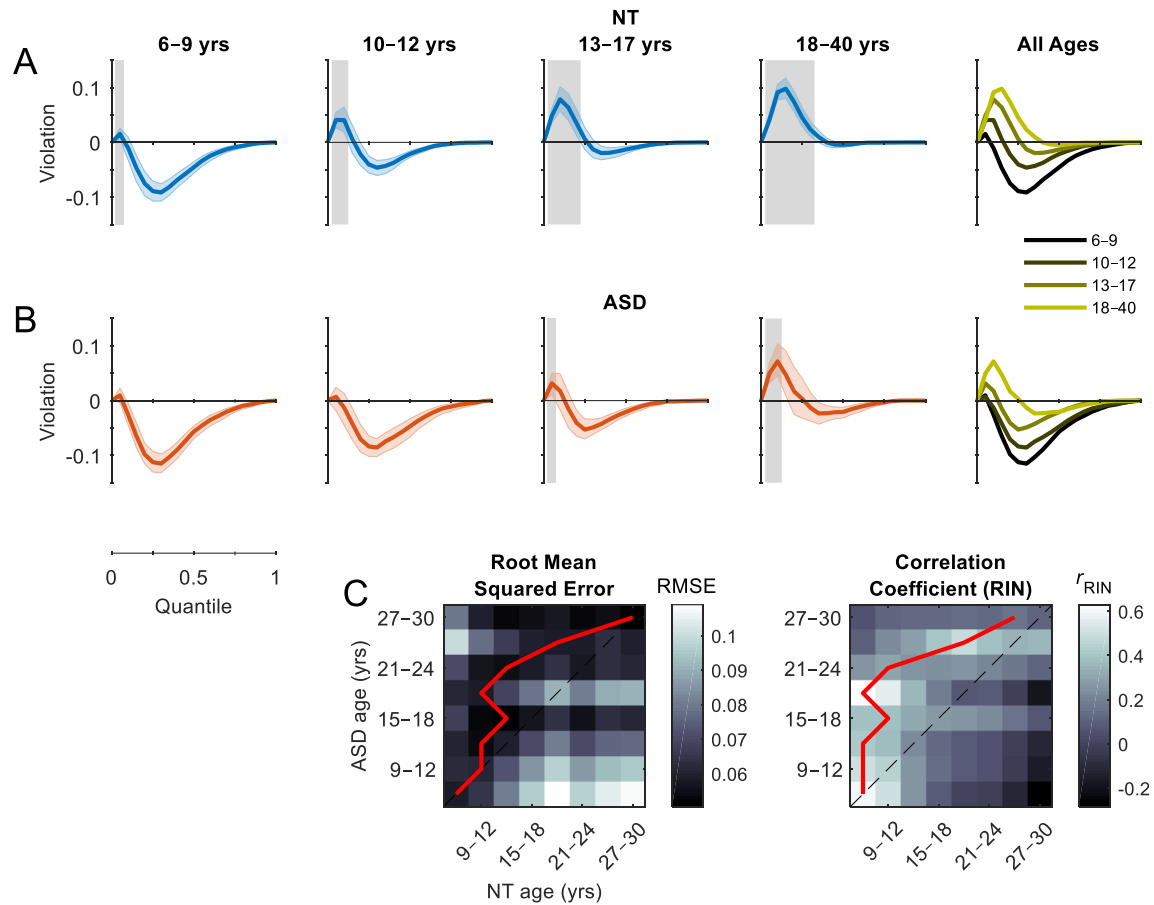

416  
 417 **Figure 3.** Testing the race model. **A, B,** Violation of the race model is quantified by the difference between  
 418 the CDFs of the multisensory condition and the race model. Positive values reflect quantiles where  
 419 multisensory RTs were faster than predicted by the race model. Gray shaded regions indicate significant  
 420 differences ( $p < 0.05$ , right-tailed permutation tests,  $t_{\max}$  corrected). Colored error bounds indicate 95%  
 421 CIs (bootstrapped). **C,** Root mean squared error (left panel) and RIN-transformed Pearson correlation  
 422 coefficient (right panel) between the violation functions for NT and ASD participants of different ages  
 423 (range: 6–30 years, increment: 3 years). Red lines indicate the minimum (left panel) and maximum (right  
 424 panel) values of each row (i.e., the age groups that were most similar). Divergence of the red line above  
 425 the dotted midline indicates a developmental delay in ASD participants.

426 **Delayed multisensory development in autism**

427 We constructed a linear model to evaluate the effects of diagnosis and age on multisensory gain ( $R^2_{\text{adj}} =$   
428 0.388). Multisensory gain, as indexed by the AUC (Eq. 6, Fig. 4A), increased as a function of age ( $\beta = 0.25,$   
429  $SE = 0.02, p = 2 \times 10^{-21}$ ) but was significantly reduced in participants with ASD compared to NT individuals  
430 ( $\beta = -1.98, SE = 0.68, p = 0.004$ ). The absence of an interaction suggests that this maturation effect was  
431 present in both groups ( $\beta = 0.01, SE = 0.04, p = 0.77$ ). *Post hoc* comparisons were conducted within each  
432 of the four age groups. For this analysis, NT participants were sex- and age- matched to each of the ASD  
433 participants and compared at every quantile using two-tailed (unpaired) permutation tests. Group  
434 differences were observed in the adolescent group at quantiles 4 and 5 ( $p < 0.05$ , shaded area, Fig. 4C).  
435 To compare the overall multisensory gain, we conducted permutation tests on the AUC (Fig. 4D), revealing  
436 differences in participants aged 10–12 years ( $t_{(50)} = 2.22, p = 0.031, d = 0.61, 95\text{CI} [0.1, 1.15]$ ) and 13–17  
437 years ( $t_{(60)} = 2.57, p = 0.014, d = 0.65, 95\text{CI} [0.18, 1.15]$ ), but not 6–9 years ( $t_{(60)} = 0.88, p = 0.39, d = 0.21,$   
438  $95\text{CI} [-0.28, 0.72]$ ) or 18–40 years ( $t_{(44)} = 1.81, p = 0.077, d = 0.52, 95\text{CI} [-0.03, 1.19]$ ). The moderate effect  
439 size in the adult group suggests that individuals with ASD might not have “caught up” entirely by 18 years  
440 of age.

441 The effect of maturation can be seen more clearly by charting multisensory gain as a function of age (Fig.  
442 4E). Age was highly predictive of multisensory gain between 6–17 years (NT:  $R^2 = 0.34, p = 0$ ; ASD:  $R^2 =$   
443  $0.21, p = 0$ ) but not between 18–40 years (NT:  $R^2 = 0.005, p = 0.56$ ; ASD:  $R^2 = 0.052, p = 0.296$ ), suggesting  
444 that maturation of this process ceases in adulthood. To characterize this developmental trajectory more  
445 precisely, we calculated the mean multisensory gain with a moving window  $k$  of 7 years in increments of  
446 1 year (Fig. 4F). Controls were sex- and age- matched to ASD individuals within each 7-year window and  
447 compared using two-tailed permutation tests (FDR corrected). In NT participants, multisensory gain  
448 increased steadily between 6–18 years of age. In individuals with ASD, the rate of increase was more  
449 gradual and was significantly lower than that of their NT peers between the ages of 11–21 years ( $p < 0.05$ ,

450 shaded area, Fig. 4F). However, by the mid-twenties, multisensory gain was commensurate with that of  
451 NT individuals suggesting that this deficit recovers in adulthood, confirming our original hypothesis. Given  
452 that maturation appears to continue well into adulthood, a *post hoc* analysis was conducted whereby the  
453 adult group was subdivided into participants aged 18–23 years ( $n = 12$ ) and 24–40 years ( $n = 11$ ) to  
454 examine multisensory gain before and after this “catch up” point. As expected, there were significant  
455 group differences in adults aged 18–23 years ( $t_{(20)} = 2.24$ ,  $p = 0.039$ ;  $d = 0.92$ , 95CI [0.18, 1.98]; Fig. 4H,  
456 left) but not in adults aged 24–40 years ( $t_{(22)} = 0.36$ ,  $p = 0.72$ ;  $d = 0.14$ , 95CI [-0.64, 1.0]; Fig. 4H, right).  
457 Group average violation functions were almost identical at every quantile between NT and ASD adults  
458 aged 24–40 years (Fig. 4G, right), suggesting both qualitative and quantitative recovery.

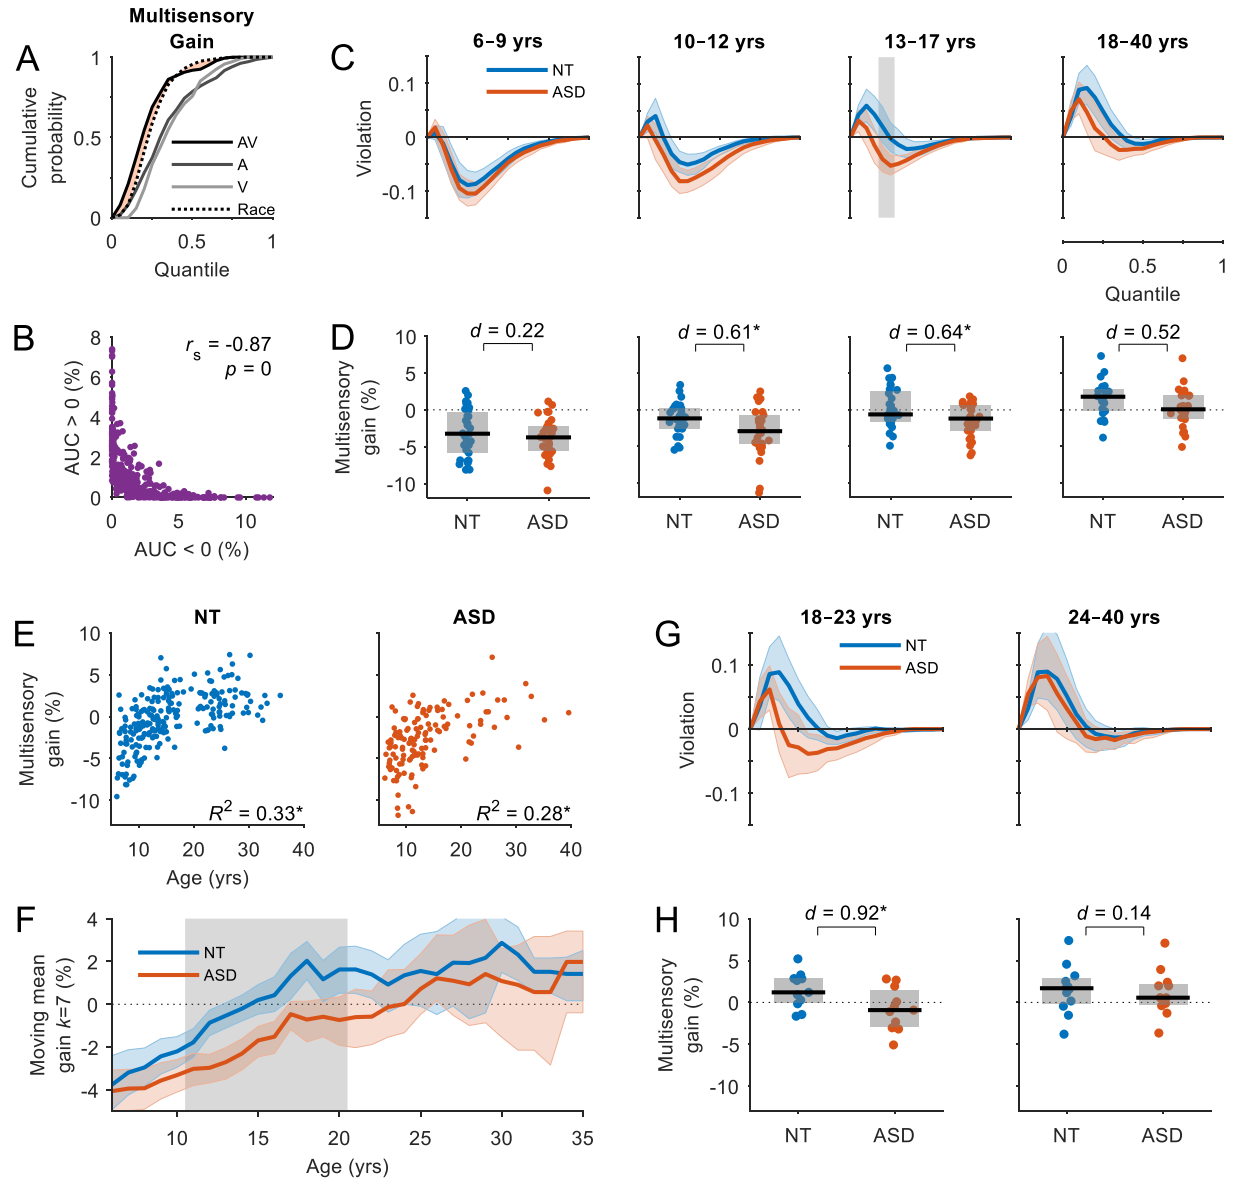

459

460 **Figure 4.** Developmental course of multisensory gain. **A**, RT cumulative probability for each of the three  
 461 stimulus conditions and the race model. Multisensory gain is quantified by the area between the CDFs of  
 462 the multisensory condition and the race model (Eq. 7). Data from an example NT adult participant. **B**, The  
 463 area under the curve (AUC) below zero is negatively correlated with the AUC above zero, providing  
 464 information about participants that do not exceed statistical facilitation. **C**, Race model violation for ASD  
 465 (red trace) and sex- and age- matched NT (blue trace) participants by age group. Colored error bounds  
 466 indicate 95% CIs (bootstrapped). Gray shaded regions indicate significant group differences ( $p < 0.05$ , two-



467 tailed permutation tests,  $t_{\max}$  corrected). **D**, Multisensory gain by age group. Boxplots indicate the median  
468 value (black line) and interquartile range (grey box). Each datapoint represents an individual participant  
469 (blue = NT, red = ASD). Brackets indicate unpaired statistical comparisons ( $*p < 0.05$ , two-tailed  
470 permutation tests, FDR corrected). **E**, Multisensory gain as a function of age for NT (left) and ASD (right)  
471 individuals. Each datapoint represents an individual participant. **F**, Mean multisensory gain calculated with  
472 a moving window  $k$  of 7 years in increments of 1 year from 6–35 years for NT (blue trace) and ASD (red  
473 trace) participants. Colored error bounds indicate 95% CIs (bootstrapped). Gray shaded regions indicate  
474 significant group differences ( $p < 0.05$ , two-tailed permutation tests, FDR corrected). **G**, Race model  
475 violation for ASD and sex- and age- matched NT adults separated into 18–23 years ( $n = 12$ , left) and 24–  
476 40 years ( $n = 11$ , right). **H**, Multisensory gain for the same adult groups.

#### 477 **Modality switch effects**

478 To quantify MSEs, we derived separate CDFs for switch and repeat trials and computed the area between  
479 them (Eq. 8). We modelled the effects of diagnosis, age and condition on MSEs using a linear model ( $R^2_{\text{adj}}$   
480 = 0.303). MSEs increased with age ( $\beta = 0.17$ ,  $SE = 0.02$ ,  $p = 7 \times 10^{-24}$ ) and were reduced in individuals with  
481 ASD compared to NT individuals ( $\beta = -1.18$ ,  $SE = 0.24$ ,  $p = 7 \times 10^{-7}$ ). Compared to multisensory trials, MSEs  
482 were larger on both auditory trials ( $\beta = 4.67$ ,  $SE = 0.03$ ,  $p = 6 \times 10^{-57}$ ) and visual trials ( $\beta = 3.66$ ,  $SE = 0.03$ ,  $p$   
483 =  $3 \times 10^{-37}$ ). Follow-up permutation tests revealed that MSEs were only reduced in the adolescent ASD  
484 group, and only when switching from auditory to visual stimuli ( $t_{(60)} = 2.76$ ,  $p = 0.021$ ,  $d = 0.69$ , 95CI [0.22,  
485 1.19]; Fig. 5A). A more detailed examination using a moving mean estimate of MSE showed that group  
486 differences emerged between the ages of 10–16 years ( $p < 0.05$ , shaded area, Fig. 5B, right). The  
487 maturational course of visual to auditory MSEs appears to continue later into development than that of  
488 auditory to visual switches in both groups (Fig. 5B, left).

489 Contrary to our results, a study by Williams et al. (2013) found that individuals with ASD between the ages  
 490 of 8–15 years exhibited a greater cost to switching from auditory to visual stimuli than their age-matched  
 491 NT peers. To make a more direct comparison with their study, we performed a two-tailed permutation  
 492 test on a group of sex- and age- matched participants between the ages of 8–15 years ( $n = 72$ ) and used a  
 493 similar measure of MSE based on mean RT values. This approach yielded the same outcome as before,  
 494 with ASD individuals exhibiting smaller MSEs (NT:  $30.5 \pm 27.4$  ms, ASD:  $19.7 \pm 38.7$  ms;  $t_{(142)} = 1.93$ ,  $p =$   
 495  $0.049$ ,  $d = 0.32$ , 95CI  $[-0.004, 0.66]$ ), confirming the discrepancy was not the result of how MSE was  
 496 quantified. The only remaining difference between our two studies was that Williams et al. (2013) used  
 497 longer ISIs (3–5 s versus 1–3 s). Thus, we repeated the test focusing on RTs with preceding ISIs between  
 498 2.5–3 s. Limiting the analysis to longer ISIs caused a significant drop in MSE for NT individuals ( $16.2 \pm 42.8$   
 499 ms) but not so much for individuals with ASD ( $16.8 \pm 51.5$  ms). Moreover, this modification revealed no  
 500 group differences ( $t_{(142)} = -0.07$ ,  $p = 0.954$ ,  $d = -0.01$ , 95CI  $[-0.34, 0.31]$ ), suggesting invocation of disparate  
 501 mechanisms underlying MSEs at shorter versus longer ISIs.

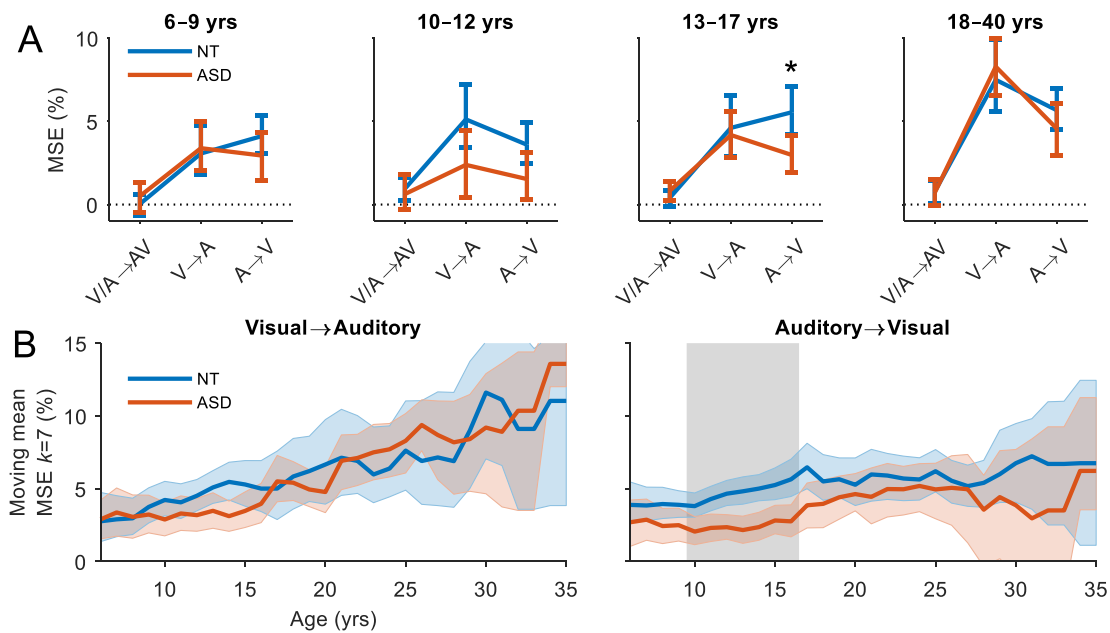

502

503 **Figure 5.** Modality switch effects. **A**, Mean MSE for each condition by age group. MSEs were quantified by  
 504 the area between the CDFs of the switch and repeat trials (Eq. 8). Error bars indicate 95% CIs

505 (bootstrapped). Asterisks indicate significant group differences ( $p < 0.05$ , two-tailed permutation tests,  
506  $t_{\max}$  corrected). **B**, Mean MSE for visual to auditory (left panel) and auditory to visual (right panel) switches  
507 calculated with a moving window  $k$  of 7 years in increments of 1 year from 6–35 years for NT (blue trace)  
508 and ASD (red trace) participants. Colored error bounds indicate 95% CIs (bootstrapped). Gray shaded  
509 regions indicate significant group differences ( $p < 0.05$ , two-tailed permutation tests, FDR corrected).

### 510 **Divided attention in autism**

511 To gain a better understanding of what aspects of multisensory processing led to differences in behavior,  
512 we adopted a computational framework based on the race model (Otto and Mamassian, 2012). The  
513 inclusion of 2 additional free parameters in the race model allowed us to quantify the additional variability  
514 or noise  $\eta$  in empirical multisensory RTs, as well as the correlation  $\rho$  between RTs on different sensory  
515 channels, giving us insight into how attention is divided between them (see Methods for details). We  
516 hypothesized that the increase in RT variability would be larger for individuals with higher multisensory  
517 gain, and that channel dependency would be lower or more negatively correlated for individuals with  
518 greater MSEs. The best-fitting estimates of the noise parameter  $\eta$  increased with age ( $\beta = 0.0045$ ,  $SE =$   
519  $0.0008$ ,  $p = 4 \times 10^{-8}$ ) but was not statistically different between NT and ASD participants ( $\beta = -0.016$ ,  $SE =$   
520  $0.012$ ,  $p = 0.17$ ;  $R^2_{\text{adj}} = 0.0899$ ; Fig. 6C). The best-fitting estimates of the correlation parameter  $\rho$  decreased  
521 with age ( $\beta = -0.035$ ,  $SE = 0.003$ ,  $p = 1 \times 10^{-29}$ ) and were lower (and sometimes more negative) for NT  
522 individuals ( $\beta = -0.25$ ,  $SE = 0.04$ ,  $p = 2 \times 10^{-9}$ ;  $R^2_{\text{adj}} = 0.38$ ; Fig. 6D). *Post hoc* permutation tests revealed  
523 moderate group differences in participants aged 10–12 years ( $t_{(50)} = 1.97$ ,  $p = 0.05$ ,  $d = 0.54$ , 95CI [0.01,  
524 1.18]) and 13–17 years ( $t_{(60)} = 2.15$ ,  $p = 0.036$ ,  $d = 0.54$ , 95CI [0.06, 1.06]). This greater (more positive)  
525 channel dependency in ASD suggests a more even spread of attention across sensory systems.

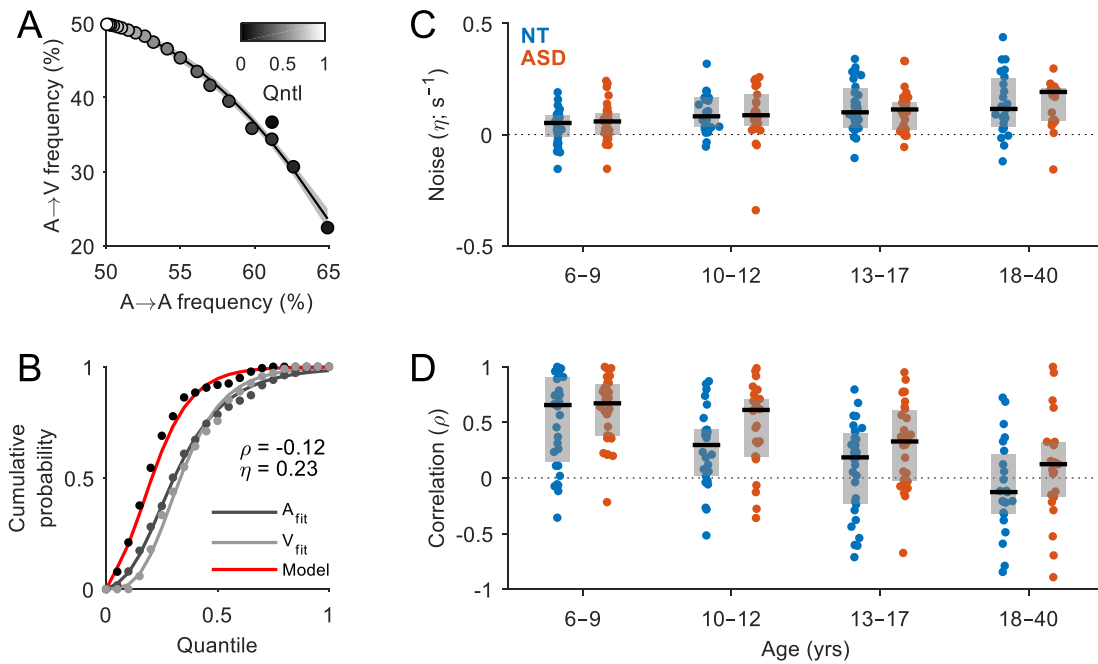

526

527 **Figure 6.** Modelling channel dependency and RT variability. **A**, Frequency of visual and auditory trials

528 preceded by auditory trials in each quantile (i.e., switch versus repeat trials). Quantiles are indicated by a

529 grayscale, graduating from black (fastest quantile) to white (slowest quantile). Example data averaged

530 over all NT adult participants. **B**, CDFs were fit to the unisensory RT data and used to predict empirical

531 multisensory RT data via Otto's context variant race model (Otto and Mamassian, 2012). Free parameters

532  $\rho$  and  $\eta$  account for the correlation between RTs on different channels and increased RT variability or

533 noise, respectively. Data from an example NT adult participant. **C**, **D**, Best-fitting model parameters  $\rho$  and

534  $\eta$  by diagnosis and age group. Boxplots indicate the median value (black line) and interquartile range (grey

535 box). Each datapoint represents an individual participant (blue = NT, red = ASD).

### 536 **Modelling multisensory development**

537 To assess whether the race model could predict multisensory benefits in children and individuals with

538 ASD, one-way ANCOVAs were used to measure the correlation between predicted and empirical benefits

539 in each age group. Predicted benefits were correlated with empirical benefits in both NT ( $F_{(1,217)} = 62.86$ ,

540  $p = 1 \times 10^{-13}$ ,  $R^2 = 0.23$ ) and ASD ( $F_{(1,125)} = 5.25$ ,  $p = 0.024$   $R^2 = 0.04$ ) individuals but an interaction suggested

541 that this relationship was dependent on age group (NT:  $F_{(3,217)} = 5.4$ ,  $p = 0.0013$ ,  $R^2 = 0.07$ ; ASD:  $F_{(3,125)} =$   
542  $2.58$ ,  $p = 0.057$ ,  $R^2 = 0.06$ ). Figure 7A, B shows that the ability of the race model to predict empirical  
543 benefits increases significantly over the course of development. While a race model account predicts a  
544 significant proportion of the variance in the adult groups (NT:  $R^2 = 0.49$ ,  $p = 0$ ; ASD:  $R^2 = 0.25$ ,  $p = 0.017$ ),  
545 it accounted for almost none of the variance in the youngest (6–9 years) groups (NT:  $R^2 = 0.007$ ,  $p = 0.55$ ;  
546 ASD:  $R^2 = 0.002$ ,  $p = 0.78$ ). If multisensory benefits in young children cannot be explained by probability  
547 summation, then how do we model the underlying cognitive architecture?

548 To address this question we proposed two alternative models: 1) multisensory RTs are biased towards a  
549 specific modality (Model 1A, V), 2) multisensory RTs are biased towards the modality of the preceding trial  
550 (Model 2A, V; see Methods for details). We parametrically varied the probability  $p$  of a multisensory  
551 response being triggered by a race strategy or one of the above bias-driven strategies and assessed how  
552 well each model could predict empirical benefits. Figure 7C shows that Model 1A was most accurate at  
553 predicting the variance in empirical benefits across children with ASD aged 6–9 years, suggesting that their  
554 responses were mostly triggered by the previous modality, with a bias towards the auditory modality. In  
555 their NT counterparts, none of the models provided significant improvement beyond the race model,  
556 although there was evidence for a bias towards the auditory modality as well (Fig. 7C). In children with  
557 ASD aged 10–12 years, Model 1V provided a significant improvement in performance, suggesting that RTs  
558 were largely determined by the previous modality, but this time, with a bias towards the visual modality  
559 (Fig. 7D). In NT children aged 10–12 years, there was no major improvement beyond the race model again,  
560 but there was a slight bias towards the visual modality as well. In teenagers and adults, none of the models  
561 outperformed the race model suggesting that individuals with ASD begin to adopt a race strategy by  
562 adolescence (Fig. S2). Before this stage, it appears that they are biased towards the preceding modality  
563 regardless of which sensory modality is faster.

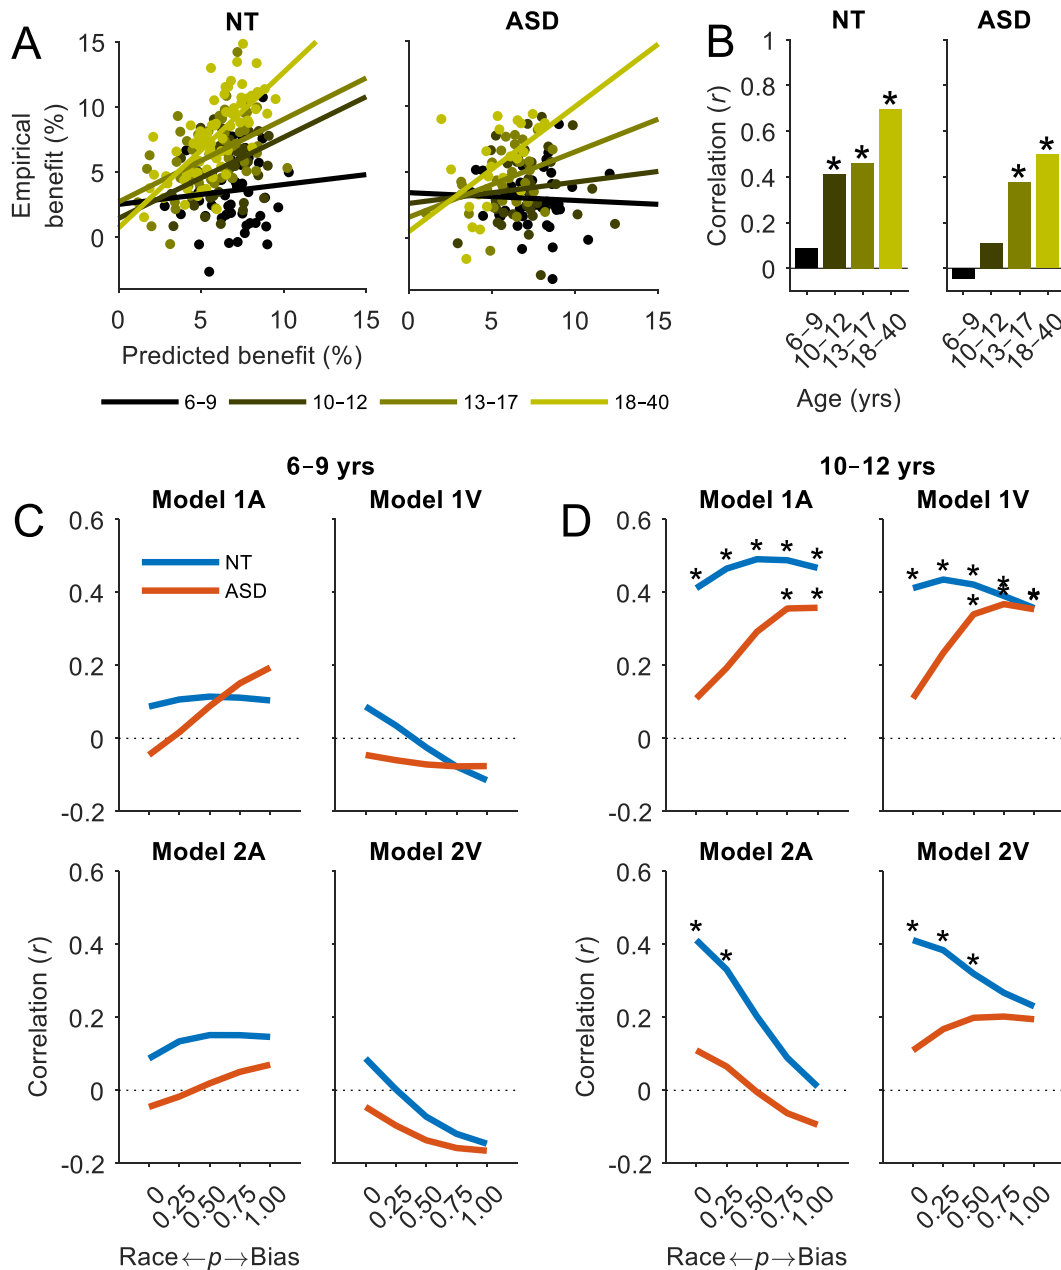

564

565 **Figure 7.** Predicting multisensory benefits. **A**, Predicted benefits versus empirical benefits for NT (left  
566 panel) and ASD (right panel) participants. Each datapoint represents an individual participant and age  
567 group is indicated by color. Solid lines represent linear fits to the data by age group. **B**, Pearson correlation  
568 coefficient (*r*) of the regression fits in panel A. Asterisks indicate significant correlations ( $p < 0.05$ , two-  
569 tailed permutation tests). **C**, **D**, Four alternative models of multisensory processing were tested. Model  
570 1A was biased towards the auditory modality and Model 1V towards the visual modality. Model 2A was

571 biased towards the preceding modality and the A modality when preceded by an AV trial, and Model 1V  
572 was biased towards the preceding modality and the V modality when preceded by an AV trial. The  
573 probability  $p$  of a response being triggered by a race strategy or a biased strategy was parametrically  
574 varied between 0 and 1 in increments of 0.25. The ability of each model to predict the variance in empirical  
575 benefits was assessed within each age group based on the Pearson correlation coefficient as in panel B.  
576 Data presented are the two younger age groups. See supplementary material for the two older age  
577 groups.

### 578 **Developmental changes in sensory dominance**

579 To further examine developmental patterns in sensory dominance, we tested the same models but with  
580 the probability of a sensory-specific bias set to 1 (Fig. 8A). Evaluating model performance as before, we  
581 noticed an auditory dominance in both groups at 6–9 years of age that shifted to a visual dominance by  
582 10–12 years of age. In the NT group, this visual dominance appears to continue into adulthood in  
583 accordance with the well-known Colavita visual dominance effect (Colavita, 1974). However, in the ASD  
584 group, this sensory weighting appears to shift once again in adolescence, leading to an auditory  
585 dominance in adulthood.

586 If such sensory dominances genuinely exist when processing multisensory information, one would expect  
587 to see a greater MSE when switching from the less dominant modality to an AV stimulus. To test this  
588 hypothesis, we examined MSEs on AV switch trials, this time separating trials preceded by A and V stimuli  
589 (Fig. 8B). MSEs were normalized by MSEs for the grouped V/A→AV trials to allow for meaningful  
590 comparison across age groups (this did not change the results qualitatively). Based on our modelling  
591 analysis, we expected to see greater MSEs on V→AV trials for TD children (6–9 years) and on A→AV trials  
592 for older TD children and adults (10–40 years). We expected something similar for ASD individuals with  
593 another shift in adolescence. The data in Figure 8B suggest that, as predicted, MSEs were greater on V→AV

594 trials for TD children (6–9 years) and on A→AV trials for older TD children and adults (10–40 years). For  
595 ASD individuals, the data suggest the reverse, with greater MSEs on A→AV trials in children and teenagers  
596 (6–17 years) and on V→AV trials for adults (18–40 years).

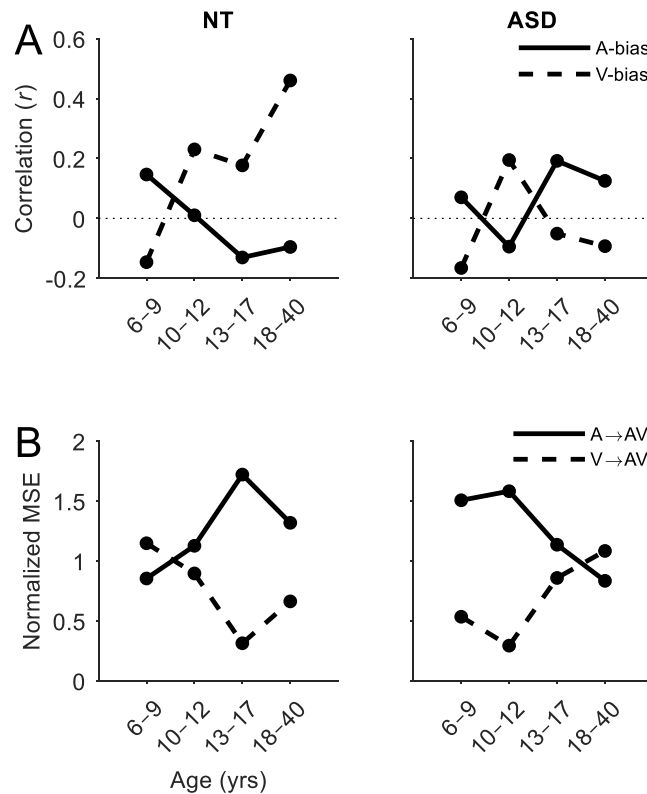

597  
598 **Figure 8.** Sensory dominance during audiovisual processing. **A**, Developmental changes in sensory  
599 dominance were examined by measuring the performance of models 2A (A-bias, solid trace) and 2V (V-  
600 bias, dotted trace) with the probability of a sensory bias  $p$  set to 1. The ability of each model to predict  
601 the variance in empirical benefits was assessed within each age group based on the Pearson correlation  
602 coefficient. **B**, Modality switch effects for AV trials separated by trials preceded by A-stimuli (solid trace)  
603 and V-stimuli (dotted trace). MSEs were quantified by the area between the CDFs of the switch and repeat  
604 trials and normalized by the grouped V/A→AV MSEs.



605 **Linking modality switch effects and redundant signals effects**

606 To examine the relationship between MSEs and multisensory gain, we performed a series of partial  
 607 correlations across participants, controlling for age (Table 3). As one might predict, there was a strong  
 608 positive correlation between the average multisensory gain on switch trials and the average MSE on  
 609 unisensory trials (but not on multisensory trials). However, there was no significant correlation between  
 610 multisensory gain on repeat trials and MSEs on unisensory trials, whereas there was a strong positive  
 611 correlation with MSEs on multisensory trials. This pattern, which was identical in both groups (see Fig. S3),  
 612 confirms that MSEs on unisensory trials are more likely to contribute to multisensory gain. Figure 9A, B  
 613 illustrates the impact of switching sensory modality on race model violation and multisensory gain,  
 614 respectively. 87% of NT individuals exhibited a larger multisensory gain on switch trials than on repeat  
 615 trials ( $t_{(224)} = 15.62, p = 0, d = 0.84, 95CI [0.73, 0.96]$ ), with 82% of individuals with ASD showing the same  
 616 ( $t_{(132)} = 6.74, p = 0, d = 0.51, 95CI [0.35, 0.68]$ ). Nevertheless, when we submitted RTs from the repeat trials  
 617 to a race model test, every group violated the race model as before except the adolescent ASD group  
 618 (Table S2), even when using a more conservative test based on Miller’s bound (Table S3).

619 **Table 3.** Partial correlations between multisensory gain and MSEs, controlling for age. Multisensory gain  
 620 was computed separately for switch trials (left columns) and repeat trials (right columns). Values indicate  
 621 coefficients of determination ( $R^2$ ) and significance of the correlation ( $p$ ).

|     | Gain on Switch Trials       |                                         |                                         | Gain on Repeat Trials                   |                                        |                             |
|-----|-----------------------------|-----------------------------------------|-----------------------------------------|-----------------------------------------|----------------------------------------|-----------------------------|
|     | V/A→AV                      | V→A                                     | A→V                                     | V/A→AV                                  | V→A                                    | A→V                         |
| NT  | $R^2 = 0.001$<br>$p = 0.7$  | $R^2 = 0.3$<br>$p = 3 \times 10^{-19}$  | $R^2 = 0.18$<br>$p = 3 \times 10^{-11}$ | $R^2 = 0.25$<br>$p = 1 \times 10^{-15}$ | $R^2 = 2 \times 10^{-6}$<br>$p = 0.98$ | $R^2 = 0.003$<br>$p = 0.43$ |
| ASD | $R^2 = 0.035$<br>$p = 0.03$ | $R^2 = 0.29$<br>$p = 2 \times 10^{-11}$ | $R^2 = 0.21$<br>$p = 4 \times 10^{-8}$  | $R^2 = 0.31$<br>$p = 3 \times 10^{-12}$ | $R^2 = 0.026$<br>$p = 0.06$            | $R^2 = 0.001$<br>$p = 0.75$ |

622 Having established the relationship between MSEs and multisensory gain, we wished to determine  
 623 whether the contribution of the former was a full or partial. To do this, we submitted the data to a  
 624 mediation analysis (Wager et al., 2008). Specifically, we tested whether MSEs mediated the relationship  
 625 between participant age and multisensory gain (Fig. 9C, D). First, we established that age was a reliable

626 predictor of both MSE (NT:  $\beta = 0.25$ ,  $SE = 0.03$ ,  $p = 0.0002$ ; ASD:  $\beta = 0.22$ ,  $SE = 0.05$ ,  $p = 0.001$ ) and  
 627 multisensory gain (NT:  $\beta = 0.25$ ,  $SE = 0.02$ ,  $p = 0.001$ ; ASD:  $\beta = 0.27$ ,  $SE = 0.04$ ,  $p = 0.0002$ ), meeting the  
 628 first two criteria for mediation (see Methods for details). MSE affected gain, controlling for age (NT:  $\beta =$   
 629  $0.23$ ,  $SE = 0.05$ ,  $p = 0.0002$ ; ASD:  $\beta = 0.33$ ,  $SE = 0.08$ ,  $p = 0.0001$ ) and the mediation effect was significant  
 630 for both groups (NT:  $\beta = 0.06$ ,  $SE = 0.01$ ,  $p = 0.0002$ ; ASD:  $\beta = 0.07$ ,  $SE = 0.02$ ,  $p = 0.0001$ ). However, there  
 631 was still a significant direct path between age and gain when controlling for MSE (NT:  $\beta = 0.19$ ,  $SE = 0.03$ ,  
 632  $p = 0.0002$ ; ASD:  $\beta = 0.19$ ,  $SE = 0.04$ ,  $p = 0.0004$ ), indicating that MSE only partially mediated the observed  
 633 relationship between age and multisensory gain.

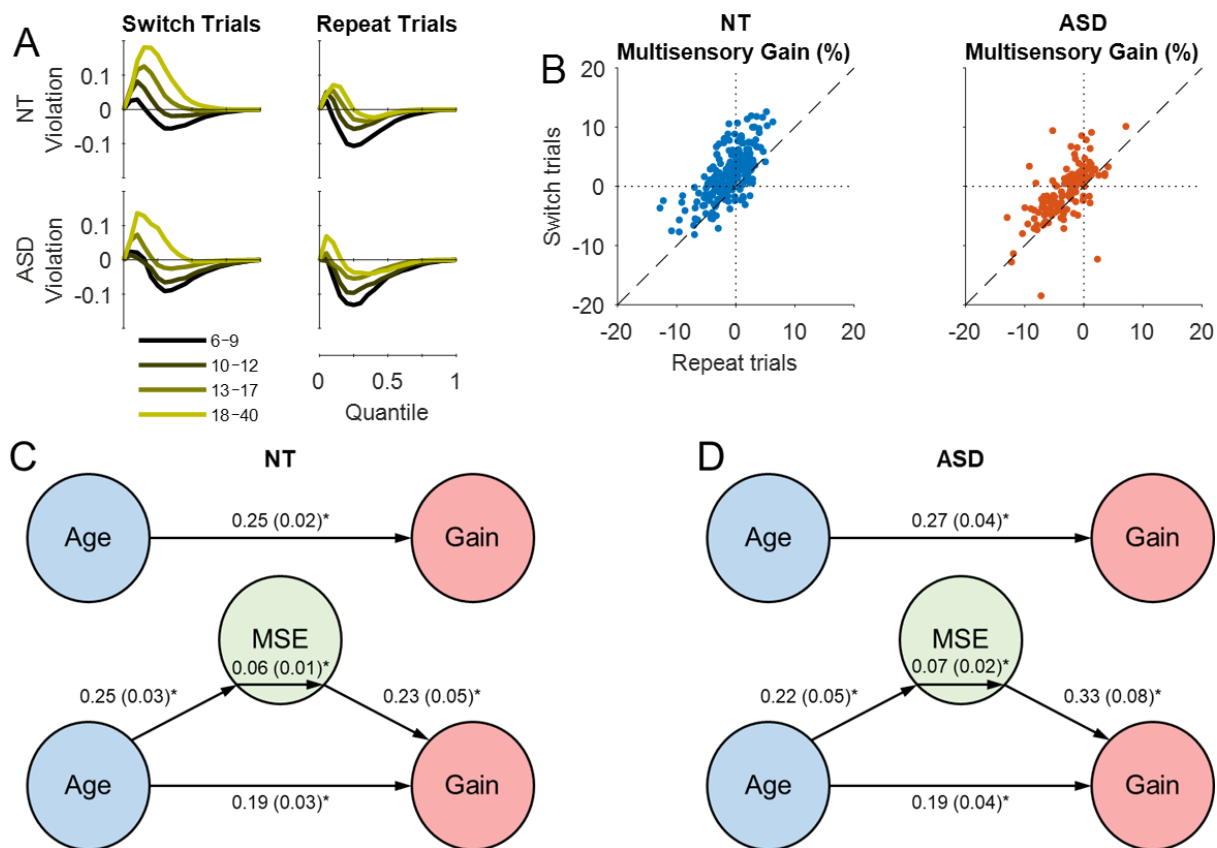

634  
 635 **Figure 9.** Linking modality switch effects and redundant signals effects. **A**, Race model violation by  
 636 diagnosis and age for switch trials (left panel) and repeat trials (right panel). **B**, Multisensory gain on switch  
 637 trials versus repeat trials for NT (left panel) and ASD (right panel) individuals. Each datapoint represents

638 an individual participant. **C, D**, Mediation model that tested whether modality switch effects (MSEs)  
639 mediated the effect of age on multisensory gain. Paths between nodes are labeled with regression  
640 coefficients, with SE in parentheses ( $*p < 0.001$ , bootstrapped). In both groups, age predicted gain (top  
641 path), and predicted MSE controlling for gain (lower left path). The middle coefficients indicate formal  
642 mediation effects but the significant direct paths between age and gain controlling for MSE (bottom path)  
643 suggest only partial mediation, i.e., MSE did not explain all of the shared variance between age and gain.

## 644 **Discussion**

645 Our data suggest that the amelioration of multisensory deficits in ASD generalizes to the case of nonsocial  
646 AV stimuli, but that the developmental trajectory of this recovery is protracted compared to that observed  
647 in AV speech studies (e.g., Taylor et al., 2010; Foxe et al., 2015). We hypothesized that this delay may be  
648 due to lack of environmental exposure to such ecologically-irrelevant stimuli (Beker et al., 2017; Cuppini  
649 et al., 2017), or engagement of neural processes with longer developmental trajectories. Indeed,  
650 multisensory gain in NT individuals has been shown to reach full maturity much later for simple AV stimuli  
651 such as those used here (Brandwein et al., 2011) compared to AV speech stimuli (Ross et al., 2011). This  
652 undoubtedly effects the average age at which individuals with ASD catch up to their NT peers, suggesting  
653 that it is important to consider the maturational course in typically-developing individuals within different  
654 contexts when examining developmental recovery in any clinical population.

655 The disparity in multisensory development for speech and non-speech stimuli likely reflects the fact that  
656 multisensory processing occurs across distributed networks and that different stimuli and tasks tap into  
657 unique processes with varying maturational courses (Chandrasekaran, 2017). The task employed in the  
658 current study required the speeded detection of simple AV stimuli, without discrimination, identification  
659 or any higher-order cognitive processing. Integration of such simple AV stimuli likely consists of early  
660 cross-sensory activation of visual and auditory cortical regions, enhancing detection of the incoming visual

661 and auditory inputs, respectively (Molholm et al., 2002; Mercier et al., 2013; Mercier et al., 2015). In  
662 contrast, identification of AV speech engages an extensive network of hierarchically-organized brain areas  
663 (Hickok and Poeppel, 2007; Peelle, 2019), projecting the spectrotemporal dynamics to a phonetic  
664 representation and from there to a lexical-semantic one. Moreover, integration of auditory and visual  
665 speech cues may act through multiple integrative mechanisms (see Peelle and Sommers, 2015); 1) an early  
666 mechanism that provides information about the timing of the incoming acoustic input, activating auditory  
667 cortex and increasing perceptual sensitivity (Megevand et al., 2018), 2) a later mechanism that provides  
668 information about the content of a vocal utterance (i.e., place and/or manner of articulation), reducing  
669 the density of phonemic and lexical neighborhoods (Tye-Murray et al., 2007). Clearly, task demands and  
670 stimuli play a major role in the patterns of multisensory deficits and recovery functions that are observed  
671 for any given experimental paradigm.

672 Alternatively, differences in maturational patterns could be caused by influences from task-specific,  
673 extraneous neural processes. Phenomena such as modality switch effects, which contribute significantly  
674 to multisensory gain in a bisensory detection task but not in an AV speech identification task, could  
675 prolong the perceived maturational course of multisensory processing. While this is consistent with the  
676 fact that maturation of MSEs (visual to auditory) extended well into adulthood (Fig. 5B, left), the  
677 developmental trajectory of multisensory gain was qualitatively unchanged when the contribution of  
678 MSEs was diminished by focusing on the repeat trials (Fig. S4). This, and the results of the mediation  
679 analysis, suggest that MSEs are not the sole driving factor behind our measure of multisensory gain and  
680 its prolonged maturational course. Another extraneous factor that could impact the developmental  
681 trajectory of multisensory gain in the context of a bisensory detection task is the underlying processing  
682 strategy used to couple decisions on separate sensory channels and trigger a speeded response (e.g., race  
683 strategy versus sensory-specific bias). This factor would likely have no influence in the context of an AV  
684 speech identification task, thus potentially contributing to the disparity in multisensory development.

685 **Modality switch effects**

686 One of the unexpected findings to emerge from our analysis was the reduced cost of switching sensory  
687 modality (auditory to visual) in ASD participants between the ages of 10–16 years. This ran contrary to a  
688 recent study (Williams et al., 2013) that reported larger switch costs in individuals with ASD of  
689 approximately the same age. Interestingly, a *post hoc* analysis of our data that focused on trials with  
690 longer ISIs closer to that of Williams et al. (2013) led to a significant reduction in MSEs in NT individuals  
691 and only a slight reduction in individuals with ASD. This modification revealed no group difference,  
692 suggesting an interaction between group and ISI. A possible explanation for this interaction comes from  
693 work investigating MSEs in schizophrenia patients and the so-called “trace theory” (Zubin, 1975). This  
694 theory suggests that sensory information leaves traces of residual activity in different neuronal  
695 populations, facilitating the processing of subsequent stimuli of the same sensory modality and inhibiting  
696 the processing of stimuli of other modalities. Zubin (1975) predicted that these traces attenuate over time  
697 but persist longer in individuals with schizophrenia. If such an inhibitory cross-sensory mechanism were  
698 weaker in individuals with ASD, but persisted longer over time, it would explain the interaction that we  
699 observe here and the findings of Williams et al. (2013). Evidence in support of this theory comes from a  
700 recent study that demonstrated that individuals with ASD weight recent stimuli less heavily than NT  
701 individuals and that their perception is dominated by longer-term statistics (Lieder et al., 2019).

702 Reduced cross-sensory inhibition would undoubtedly make it easier to process subsequent sensory  
703 information in other modalities, leading to lower MSEs. However, it would also likely result in lower  
704 attentional engagement with task/sensory-relevant information. This is consistent with the fact that  
705 individuals with ASD had slower RTs and lower  $F_1$  scores across all conditions and age groups. Moreover,  
706 by modelling the correlation between RTs on separate sensory channels, we demonstrated a higher (more  
707 positive) channel dependency in ASD, suggesting a greater spread of attentional resources across sensory  
708 modalities. Neurophysiological evidence of such disengagement comes from previous work by our lab

709 that demonstrated increased susceptibility to distraction in children with ASD compared to NT children  
710 (Murphy et al., 2014). This behavioral deficit was accompanied by a reduced suppression of sensory-  
711 irrelevant information, as indexed by EEG recordings of alpha-band oscillatory activity. While individuals  
712 with ASD appear to utilize longer-term statistics to make predictions about their sensory environment  
713 (Lieder et al., 2019), other work suggest that they tend to overestimate the volatility of their environment  
714 at the expense of learning to build stable predictions (Lawson et al., 2017). In the current study, stimuli  
715 were presented in a random order with equal probability, meaning there was a 66.6% chance of the same  
716 unisensory input occurring on the next trial (including the AV condition). Based on these statistics, it is  
717 more efficient to predict the reoccurrence of same signal (or part of it) on the next trial and to direct  
718 attention therein. If these statistics are not being actively used to build predictions about the modality of  
719 an upcoming stimulus, as may be the case in ASD, then the participant may be less likely to prepare for it  
720 and less averse to switching sensory modality. This fits well with the notion that individuals with autism  
721 rely more on bottom-up over top-down processing (Maekawa et al., 2011).

### 722 **Multisensory integration or modality switch effects?**

723 It is well established that MSEs systematically contribute to multisensory facilitation in a bisensory  
724 detection task (Gondan et al., 2004; Van der Stoep et al., 2015a; Shaw et al., 2019). To determine the role  
725 of MSEs, we performed separate tests of the race model using switch and repeat trials. While we found  
726 that multisensory gain was much greater on switch trials than on repeat trials, there was still evidence of  
727 race model violation on repeat trials. However, it is important to consider that in the context of a mixed  
728 block design, responses on repeat trials are likely subject to residual switch effects from earlier trials ( $n-2$ ,  
729  $n-3$ , etc.). Furthermore, if we consider the impact that switching modality has on RTs, a mixed block design  
730 could be said to violate the assumption of context invariance. While it is unlikely that it would present the  
731 opportunity to change strategy from trial to trial in a top-down manner, it is conceivable that the  
732 continuously changing context (from switch to repeat conditions) could invoke disparate processing

733 mechanisms in a bottom-up manner (for a detailed discussion, see Shaw et al., 2019). We also measured  
734 the correlation between multisensory gain and MSEs on unisensory and multisensory trials, partialling out  
735 the effects of age. There was a strong positive correlation for unisensory (but not multisensory) stimuli,  
736 as would be expected if MSEs were to impact multisensory gain systematically. This was followed up with  
737 a mediation analyses to determine whether MSEs mediated the observed relationship between age and  
738 multisensory gain. This analysis indicated only partial mediation, suggesting that neural processes other  
739 than MSEs (e.g., cross-sensory interactions) were contributing to the observed multisensory gain.  
740 Differences in the developmental trajectories of MSEs and multisensory gain lend further support to the  
741 notion that neural processes unrelated to switching modality contribute to the RSE (Gondan et al., 2004).  
742 Another way to examine the contribution of MSEs is to remove the presence of switch trials by using a  
743 blocked design. In another study by our lab (Shaw et al., 2019), we demonstrated that RTs to simple AV  
744 stimuli do not violate the race model when the three conditions are presented in entirely separate blocks.  
745 Comparing the median RTs between blocked and mixed conditions revealed a slowing of the unisensory  
746 but not the multisensory RTs in the mixed condition that could be largely accounted for by increased RTs  
747 on switch trials. Another study that used a block design (Otto and Mamassian, 2012) did in fact report  
748 evidence of violation, but importantly, presented AV stimuli in background noise which are more likely to  
749 recruit integrative mechanisms during bisensory detection (Wallace et al., 1996; Senkowski et al., 2011;  
750 Stevenson et al., 2012). Thus, violation of the race model may involve an interplay between integrative  
751 and switching processes that carry different weights in different contexts (mixed versus block  
752 presentations) and under different stimulus conditions (clean versus noisy). However, the race model test  
753 relies on the assumption of context invariance, such that the stimulus conditions are presented in an  
754 intermixed and unpredictable fashion (Miller, 1982; Gondan and Minakata, 2016; Miller, 2016). By  
755 interleaving the conditions, the participant does not know which stimulus to expect and presumably  
756 processes, say, an auditory signal in the same way under unisensory and multisensory conditions. Thus,

757 violation of the race model is assumed to be due to multisensory interactions rather than differences in  
758 processing strategies. In contrast, when unisensory and multisensory stimuli are presented in separate  
759 blocks, there may be opportunity to employ different processing strategies in order to optimize  
760 performance.

### 761 **Modelling multisensory behavior and sensory dominance**

762 The race model provides a plausible framework for the underlying cognitive architecture implemented  
763 during speeded bisensory detection (Otto and Mamassian, 2017). Theoretically, it is the most efficient  
764 processing strategy in the context of a bisensory detection task, as an OR logic gate (which is the operation  
765 implemented by probability summation) perfectly matches the task demands placed on the participant  
766 (i.e., respond to A or V or AV). It has been demonstrated that the same architecture can be adapted to  
767 meet the demands of different tasks by changing this logical coupling accordingly (Otto and Mamassian,  
768 2012). This suggests that adults have the ability to flexibly couple multisensory decisions according to  
769 these task demands. Our data revealed that the race model under-estimated empirical benefits in the  
770 majority of adults, and over-estimated empirical benefits in the majority of children (see Fig. 2C). In other  
771 words, most children did not even achieve the basic level of statistical facilitation expected from  
772 multisensory processing. Similarly, the race model was predictive of the variance in empirical benefits  
773 across adults, but less so in children. These results suggest that the ability to flexibly couple multisensory  
774 decisions according to the task demands may only be formed later in development. To gain insight into  
775 the rules or strategies that might govern multisensory processing prior to the formation of this flexible  
776 coupling, we tested two alternative processing strategies. We examined fits between the empirical data  
777 and model behavior that was based on a parametric weighting of the race model and each alternative  
778 strategy (see Methods for details). In children with ASD aged 6–12 years, model fits suggested that the  
779 response to an AV stimulus was mostly triggered by the modality corresponding to the previous trial, as  
780 opposed to the fastest modality. This is a less efficient processing strategy because the slower modality



781 could sometimes trigger a response, but explains why younger participants did not achieve statistical  
782 facilitation. In NT children aged 6–12 years, the same model offered only marginal improvements beyond  
783 probability summation, suggesting that they begin to adopt a race strategy much earlier in development  
784 than their ASD peers.

785 A mechanistic explanation for such sub-optimal multisensory behavior in children comes from the idea of  
786 multisensory competition; before the brain develops the ability to optimally integrate multisensory  
787 information in a way that facilitates behavior, multisensory signals are thought to compete with one  
788 another for cognitive resources, inhibiting effective processing of redundant stimuli (Sinnett et al., 2008;  
789 Cuppini et al., 2010). By applying Hebbian learning rules of potentiation and depression (Hebb, 1949),  
790 computational studies have successfully modelled this developmental transition from a default state in  
791 which multisensory inputs interact competitively to one in which they interact cooperatively (Cuppini et  
792 al., 2011; Cuppini et al., 2018). Indeed, if a competition scenario were set up, it would likely favor the most  
793 effective modality, which in our case would be the preceding modality as attention has already been  
794 directed therein. This idea of multisensory competition also provides an alternative interpretation of our  
795 modelling analysis. If the previous modality were to inhibit processing of the other modality, a decision  
796 coupling mechanism that triggers a response based on the fastest modality (i.e., race strategy) would yield  
797 the same result as one based on the previous modality (i.e., biased strategy). Thus, our data point to two  
798 possible explanatory mechanisms: 1) an early cross-sensory interaction that transitions from being  
799 inhibitory to facilitatory, 2) a later decision coupling mechanism that transitions from adopting a sensory-  
800 biased strategy to a race strategy (see Fig. 10). Given the results of our modelling analysis, it is possible  
801 that both of these integrative mechanisms have not yet matured in children with ASD aged 6–12 years,  
802 whereas their NT peers may have already developed the ability to flexibly couple multisensory decisions,  
803 but not integrate early cross-sensory inputs in a facilitatory manner. Understanding the computational  
804 principles of these mechanisms and disentangling their contribution to multisensory behavior is important

805 because the race model test assumes that statistical facilitation provides a baseline measure of  
806 multisensory information processing against which to gauge interaction effects (Miller, 1982; Ulrich et al.,  
807 2007). However, if statistical facilitation does not reflect the underlying mode of operation in certain  
808 populations, then how can such a model be used to obtain valid measures of multisensory integration?

809 Another interesting finding to emerge from our modelling analysis was that NT children aged 6–9 years  
810 appear to be biased towards the auditory modality during audiovisual processing, but thereafter become  
811 biased towards the visual modality. These results were supported by a follow-up analysis based on MSEs  
812 on AV trials, as well as previous research that has demonstrated an auditory dominance in infants and  
813 young children when they are presented with AV stimuli (Lewkowicz, 1988a, b), and a visual dominance  
814 in adults, commonly known as the Colavita visual dominance effect (Colavita, 1974). Several studies have  
815 traced the transition from an auditory to a visual dominance over the course of childhood (Robinson and  
816 Sloutsky, 2004; Nava and Pavani, 2013) and, in line with our data, suggest that this sensory reweighting  
817 occurs at around 9–10 years of age (Nava and Pavani, 2013). Sensory reweighting has also been shown to  
818 occur around 8–10 years of age for the visual and haptic modalities (Gori et al., 2008). Our modelling  
819 analysis suggests that the same trend appears to emerge in children with ASD between the ages of 6–12  
820 years, but then reverses once more during adolescence, favoring the auditory modality in adulthood.  
821 However, our MSE analysis suggests that a visual dominance exists initially in children with ASD, only  
822 shifting to an auditory dominance in adulthood. Given the smaller sample sizes in the ASD group, it is  
823 possible that the MSE analysis may be a more reliable index of sensory dominance than our modelling  
824 analysis which relies on a correlational measure. Indeed, a visual dominance has been previously reported  
825 in children with ASD (O'Connor and Hermelin, 1965), but its transition into adulthood has not yet been  
826 documented to our knowledge. This finding may suggest that ASD individuals that display neurotypical  
827 levels of multisensory gain in adulthood may be doing so by way of an alternative sensory weighting  
828 strategy.

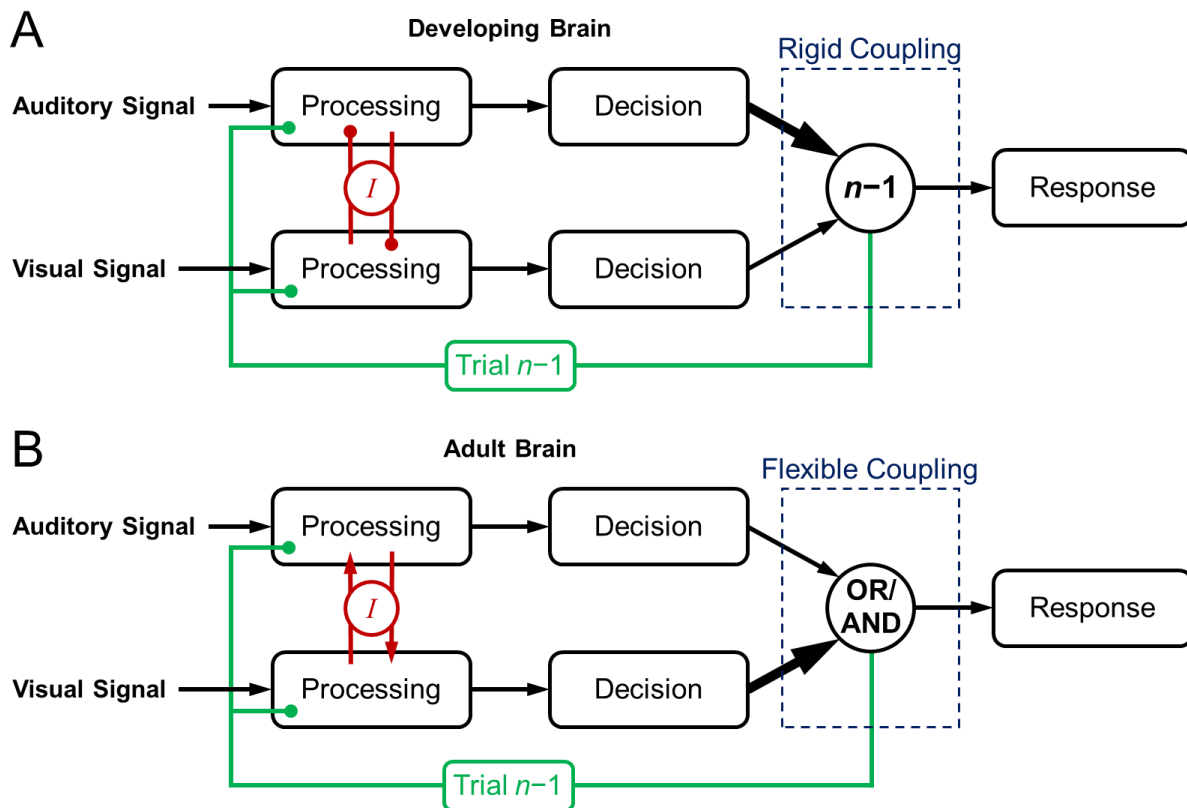

829

830 **Figure 10.** Cognitive architecture describing information processing for speeded bisensory detection. **A,**

831 **B,** Based on our findings, we proposed separate models of multisensory processing in the developing (A)

832 and adult (B) brain. Building on the race model architecture, multisensory information is processed on

833 separate channels but can interact in a cross-sensory manner and is subject to history effects (trial  $n-1$ ).

834 Separate unisensory decisions are made on each channel and are coupled according to modality/context-

835 dependent rules in order to form a multisensory decision. An inherent sensory dominance biases the

836 probability of implementing a processing strategy based on modality versus context. During the early

837 stages of maturation, multisensory signals compete for resources through inhibitory cross-sensory

838 projections. Coupling of unisensory decisions is rigid, with responses being triggered by the preceding

839 modality as opposed to the fastest (but note that the previous modality may typically be the fastest due

840 to earlier inhibitory interactions). Either way, this results in less effective processing of multisensory

841 information. In adulthood, individuals have developed the ability to integrate multisensory information in

842 a way that facilitates information processing as well as the ability to flexibly couple unisensory decisions  
843 according to specific task demands. Sensory dominance transitions from auditory to visual (Colavita  
844 effect) during maturation but may be weighted differently in individuals with ASD.

#### 845 **Neural mechanisms underlying impaired multisensory behavior in autism**

846 Prior work by our lab suggests that the neural processes underlying multisensory integration are impaired  
847 in children with autism (Brandwein et al., 2013). Specifically, we found that EEG correlates of integration  
848 were weaker (of lower amplitude) and occurred later in the information processing hierarchy. Neural  
849 indices of integration over parieto-occipital scalp between 140–160 ms were predictive of race model  
850 violation in NT children but not in children with ASD. Using the same paradigm, we recorded intracranial  
851 electrophysiology in adults with epilepsy and demonstrated that visual stimulation influenced the phase  
852 of ongoing oscillations in auditory cortex (Mercier et al., 2015), and auditory stimulation influenced the  
853 phase of ongoing oscillations in visual cortex (Mercier et al., 2013), such that cross-sensory stimulation  
854 appears to prime ancillary sensory cortices to make them more receptive to their primary sensory input.  
855 The response to the primary sensory input (e.g., visual stimulation of visual cortex) is then enhanced for  
856 multisensory trials (Mercier et al., 2013), at least in a bisensory detection task such as the current one.  
857 Furthermore, neuro-oscillatory phase alignment across the sensorimotor network was significantly  
858 enhanced by multisensory stimulation, and was related to the speed of a response (Mercier et al., 2015).  
859 Such phase resetting of ongoing neural oscillations by functionally distinct and distant neuronal ensembles  
860 is thought to be fundamental to multisensory integration (Lakatos et al., 2007; Schroeder et al., 2008;  
861 Fiebelkorn et al., 2011; Fiebelkorn et al., 2013). Impaired cross-sensory phase-resetting, as might be  
862 predicted by reduced subcortical and cortical connectivity, would likely result in impaired integrative  
863 abilities. In autism, there is evidence for such disrupted connectivity (Zeng et al., 2017; Arnold Anteraper  
864 et al., 2018), although these findings are mixed and somewhat inconclusive (Vasa et al., 2016).  
865 Nevertheless, disrupted connectivity could in turn lead to impaired cross-sensory phase-resetting and

866 hence contribute to impaired multisensory processing in ASD. As we already mentioned, weaker cross-  
867 sensory inhibition might account for reduced MSEs in ASD (Murphy et al., 2014), possibly also due to  
868 poorer brain connectivity. In contrast, it is possible that cross-sensory connectivity in children with ASD is  
869 fully intact, but that integration of multisensory information has not yet transitioned from a state of  
870 completion, to one of facilitation, as discussed earlier (Cuppini et al., 2011; Cuppini et al., 2018).

## 871 **Conclusions**

872 From the current analyses we can draw several conclusions. 1) When assessed using the race model test,  
873 multisensory processing in individuals with ASD “normalizes” by the mid-twenties. 2) In younger children,  
874 including those with ASD, statistical facilitation does not appear to reflect the underlying mode of  
875 operation as it does in adults. This could be caused by early cross-sensory inhibition and/or ineffective  
876 coupling of multisensory decision processes. 3) Differences in both MSEs and patterns in sensory  
877 dominance indicate fundamental alterations in how the nervous system of children with ASD respond to  
878 even the simplest of multisensory environments. 4) Greater channel dependency in ASD suggest a more  
879 even spread of attention, possibly due to an aversion to making predictions based on short-term statistics  
880 or an impairment in cross-sensory inhibition. The current findings also make clear that there is significant  
881 work ahead of us before we truly understand developmental shifts in multisensory integration, decision  
882 coupling, sensory weighting and modality switch effects, how these differ in children with ASD and each  
883 of their roles within the context of speeded bisensory detection. Individual variance and group differences  
884 in such patterns undoubtedly contribute to how the sensory environment is experienced at a given stage  
885 of development. Here we set the stage for detailed characterization of these processes and their  
886 interactions, to in turn understand potential roadblocks to the typical development of multisensory  
887 processing in ASD, and some of the factors that might contribute to sensory reactivity in this group.

## 888 **Author Contributions**

889 S.M. and J.J.F. designed the original experiment. M.J.C., S.M. and J.J.F. conceived of the current study.  
890 M.J.C. analyzed the data and produced all illustrations in consultation with S.M. and J.J.F. M.J.C. wrote the  
891 first substantive draft of manuscript. S.M. and J.J.F. provided editorial input to M.J.C. on multiple  
892 subsequent drafts.

## 893 **Acknowledgements**

894 The authors thank Dr. Juliana Bates who administered the majority of the clinical assessments, Dr. Natalie  
895 Russo for her contributions to the clinical phenotyping of a portion of our ASD cohort, Dr. Cristiano Cuppini  
896 for his valuable discussions, Dr. Ana Francisco for her support with statistical analyses, Douwe Horsthuis,  
897 Elise Tavern and Danielle DeMaio for their help with data collection and Dr. Alice Brandwein who  
898 conducted the previous studies for which most of these data were collected. We also extend our heartfelt  
899 gratitude to the participants and their families that have contributed their time to participate in this  
900 research. This work was supported in large part by an RO1 grant from the National Institute of Mental  
901 Health (MH085322 to S.M. and J.J.F.) and a U54 Grant (HD090260) to the Human Clinical Phenotyping  
902 Core of the Rose F. Kennedy Intellectual and Developmental Disabilities Research Center.

## 903 **Competing Financial Interests**

904 The authors declare no competing financial interests.

## 905 **References**

906 APA D-APA (2000) Diagnostic and statistical manual, 4th edn, Text Revision (DSM-IV-TR). American  
907 Psychiatric Association, Washington.  
908 Arnold Anteraper S, Guell X, D'Mello A, Joshi N, Whitfield-Gabrieli S, Joshi G (2018) Disrupted Cerebro-  
909 cerebellar Intrinsic Functional Connectivity in Young Adults with High-functioning Autism  
910 Spectrum Disorder: A Data-driven, Whole-brain, High Temporal Resolution fMRI Study. Brain  
911 connectivity.  
912 Ashby FG, Townsend JT (1986) Varieties of perceptual independence. Psychol Rev 93:154.  
913 Ayres AJ, Tickle LS (1980) Hyper-responsivity to touch and vestibular stimuli as a predictor of positive  
914 response to sensory integration procedures by autistic children. Am J Occup Ther 34:375-381.

- 915 Baron RM, Kenny DA (1986) The moderator–mediator variable distinction in social psychological research:  
916 Conceptual, strategic, and statistical considerations. *J Pers Soc Psychol* 51:1173.
- 917 Barr DJ, Levy R, Scheepers C, Tily HJ (2013) Random effects structure for confirmatory hypothesis testing:  
918 Keep it maximal. *Journal of memory and language* 68:255-278.
- 919 Bebko JM, Schroeder JH, Weiss JA (2014) The McGurk effect in children with autism and Asperger  
920 syndrome. *Autism Res* 7:50-59.
- 921 Beker S, Foxe JJ, Molholm S (2017) Ripe for solution: Delayed development of multisensory processing in  
922 autism and its remediation. *Neurosci Biobehav Rev*.
- 923 Bishara AJ, Hittner JB (2012) Testing the significance of a correlation with nonnormal data: comparison of  
924 Pearson, Spearman, transformation, and resampling approaches. *Psychol Methods* 17:399.
- 925 Blair RC, Higgins JJ, Karniski W, Kromrey JD (1994) A study of multivariate permutation tests which may  
926 replace Hotelling's T2 test in prescribed circumstances. *Multivariate Behavioral Research* 29:141-  
927 163.
- 928 Bland JM, Altman DG (1995) Calculating correlation coefficients with repeated observations: part 2—  
929 correlation between subjects. *BMJ* 310:633.
- 930 Bliss CI (1967) *Statistics in biology*. New York, NY: McGraw-Hill.
- 931 Brandwein AB, Foxe JJ, Russo NN, Altschuler TS, Gomes H, Molholm S (2011) The development of  
932 audiovisual multisensory integration across childhood and early adolescence: a high-density  
933 electrical mapping study. *Cerebral Cortex* 21:1042-1055.
- 934 Brandwein AB, Foxe JJ, Butler JS, Russo NN, Altschuler TS, Gomes H, Molholm S (2013) The development  
935 of multisensory integration in high-functioning autism: high-density electrical mapping and  
936 psychophysical measures reveal impairments in the processing of audiovisual inputs. *Cerebral*  
937 *Cortex* 23.
- 938 Brandwein AB, Foxe JJ, Butler JS, Frey H-P, Bates JC, Shulman LH, Molholm S (2015) Neurophysiological  
939 indices of atypical auditory processing and multisensory integration are associated with symptom  
940 severity in autism. *J Autism Dev Disord* 45:230-244.
- 941 Chandrasekaran C (2017) Computational principles and models of multisensory integration. *Curr Opin*  
942 *Neurobiol* 43:25-34.
- 943 Colavita FB (1974) Human sensory dominance. *Percept Psychophys* 16:409-412.
- 944 Colonius H (1986) Measuring channel dependence in separate activation models. *Percept Psychophys*  
945 40:251-255.
- 946 Colonius H (1990) Possibly dependent probability summation of reaction time. *J Math Psychol* 34:253-  
947 275.
- 948 Colonius H, Diederich A (2006) The race model inequality: interpreting a geometric measure of the amount  
949 of violation. *Psychol Rev* 113:148–154.
- 950 Crosse MJ, Di Liberto GM, Lalor EC (2016) Eye can hear clearly now: inverse effectiveness in natural  
951 audiovisual speech processing relies on long-term crossmodal temporal integration. *J Neurosci*  
952 36:9888-9895.
- 953 Cuppini C, Stein BE, Rowland BA (2018) Development of the mechanisms governing midbrain multisensory  
954 integration. *J Neurosci*:2631-2617.
- 955 Cuppini C, Ursino M, Magosso E, Rowland BA, Stein BE (2010) An emergent model of multisensory  
956 integration in superior colliculus neurons. *Front Integr Neurosci* 4:6.
- 957 Cuppini C, Stein BE, Rowland BA, Magosso E, Ursino M (2011) A computational study of multisensory  
958 maturation in the superior colliculus (SC). *Exp Brain Res* 213:341-349.
- 959 Cuppini C, Ursino M, Magosso E, Ross LA, Foxe JJ, Molholm S (2017) A Computational Analysis of Neural  
960 Mechanisms Underlying the Maturation of Multisensory Speech Integration in Neurotypical  
961 Children and Those on the Autism Spectrum. *Front Hum Neurosci* 11:518.
- 962 Davison AC, Hinkley DV (1997) *Bootstrap methods and their application*: Cambridge university press.



- 963 de Gelder B, Vroomen J, Van der Heide L (1991) Face recognition and lip-reading in autism. *Eur J Cogn*  
964 *Psychol* 3:69-86.
- 965 Diederich A, Colonius H (1987) Intersensory facilitation in the motor component? *Psychol Res* 49:23-29.
- 966 Fiebelkorn IC, Foxe JJ, Butler JS, Mercier MR, Snyder AC, Molholm S (2011) Ready, set, reset: stimulus-  
967 locked periodicity in behavioral performance demonstrates the consequences of cross-sensory  
968 phase reset. *J Neurosci* 31:9971-9981.
- 969 Fiebelkorn IC, Snyder AC, Mercier MR, Butler JS, Molholm S, Foxe JJ (2013) Cortical cross-frequency  
970 coupling predicts perceptual outcomes. *Neuroimage* 69:126-137.
- 971 Foxe JJ, Molholm S (2009) Ten years at the multisensory forum: musings on the evolution of a field. *Brain*  
972 *Topogr* 21:149-154.
- 973 Foxe JJ, Molholm S, Del Bene VA, Frey H-P, Russo NN, Blanco D, Saint-Amour D, Ross LA (2015) Severe  
974 multisensory speech integration deficits in high-functioning school-aged children with autism  
975 spectrum disorder (ASD) and their resolution during early adolescence. *Cerebral Cortex* 25:298-  
976 312.
- 977 Gielen SC, Schmidt RA, Van Den Heuvel PJ (1983) On the nature of intersensory facilitation of reaction  
978 time. *Percept Psychophys* 34:161-168.
- 979 Gondan M (2010) A permutation test for the race model inequality. *Behav Res Methods* 42:23-28.
- 980 Gondan M, Minakata K (2016) A tutorial on testing the race model inequality. *Attention, Perception, &*  
981 *Psychophysics* 78:723-735.
- 982 Gondan M, Lange K, Rösler F, Röder B (2004) The redundant target effect is affected by modality switch  
983 costs. *Psychonomic bulletin & review* 11:307-313.
- 984 Gori M, Del Viva M, Sandini G, Burr DC (2008) Young children do not integrate visual and haptic form  
985 information. *Curr Biol* 18:694-698.
- 986 Grice GR, Canham L, Gwynne JW (1984) Absence of a redundant-signals effect in a reaction time task with  
987 divided attention. *Percept Psychophys* 36:565-570.
- 988 Harrington L, Peck C (1998) Spatial disparity affects visual-auditory interactions in human sensorimotor  
989 processing. *Exp Brain Res* 122:247-252.
- 990 Hebb DO (1949) The organization of behavior. In: Wiley, New York Reprint Lawrence Erlbaum.
- 991 Hedges LV, Olkin I (1985) *Statistical Methods for Meta Analysis*. Orlando, FL: Academic Press.
- 992 Hershenson M (1962) Reaction time as a measure of intersensory facilitation. *J Exp Psychol* 63:289.
- 993 Hickok G, Poeppel D (2007) The cortical organization of speech processing. *Nature Reviews Neuroscience*  
994 8:393-402.
- 995 Hughes HC, Nelson MD, Aronchick DM (1998) Spatial characteristics of visual-auditory summation in  
996 human saccades. *Vision Res* 38:3955-3963.
- 997 Iarocci G, McDonald J (2006) Sensory integration and the perceptual experience of persons with autism. *J*  
998 *Autism Dev Disord* 36:77-90.
- 999 Innes BR, Otto TU (2019) A comparative analysis of response times shows that multisensory benefits and  
1000 interactions are not equivalent. *Sci Rep* 9.
- 1001 Irwin JR, Tornatore LA, Brancazio L, Whalen D (2011) Can children with autism spectrum disorders “hear”  
1002 a speaking face? *Child Dev* 82:1397-1403.
- 1003 Kiesel A, Miller J, Ulrich R (2007) Systematic biases and Type I error accumulation in tests of the race model  
1004 inequality. *Behav Res Methods* 39:539-551.
- 1005 Kinchla R (1974) Detecting target elements in multielement arrays: A confusability model. *Percept*  
1006 *Psychophys* 15:149-158.
- 1007 Krueger Fister J, Stevenson RA, Nidiffer AR, Barnett ZP, Wallace MT (2016) Stimulus intensity modulates  
1008 multisensory temporal processing. *Neuropsychologia* 88:92-100.
- 1009 Lakatos P, Chen C-M, O'Connell MN, Mills A, Schroeder CE (2007) Neuronal oscillations and multisensory  
1010 interaction in primary auditory cortex. *Neuron* 53:279-292.



- 1011 Lawson RP, Mathys C, Rees G (2017) Adults with autism overestimate the volatility of the sensory  
1012 environment. *Nat Neurosci* 20:1293.
- 1013 Lewkowicz DJ (1988a) Sensory dominance in infants: I. Six-month-old infants' response to auditory-visual  
1014 compounds. *Dev Psychol* 24:155.
- 1015 Lewkowicz DJ (1988b) Sensory dominance in infants: II. Ten-month-old infants' response to auditory-visual  
1016 compounds. *Dev Psychol* 24:172.
- 1017 Lieder I, Adam V, Frenkel O, Jaffe-Dax S, Sahani M, Ahissar M (2019) Perceptual bias reveals slow-updating  
1018 in autism and fast-forgetting in dyslexia. *Nat Neurosci*:1.
- 1019 Lord C, Rutter M, Le Couteur A (1994) Autism Diagnostic Interview-Revised: a revised version of a  
1020 diagnostic interview for caregivers of individuals with possible pervasive developmental  
1021 disorders. *J Autism Dev Disord* 24:659-685.
- 1022 Lord C, Risi S, Lambrecht L, Cook EH, Leventhal BL, DiLavore PC, Pickles A, Rutter M (2000) The Autism  
1023 Diagnostic Observation Schedule—Generic: A standard measure of social and communication  
1024 deficits associated with the spectrum of autism. *J Autism Dev Disord* 30:205-223.
- 1025 Luce RD (1986) Response times: Their role in inferring elementary mental organization: Oxford University  
1026 Press on Demand.
- 1027 Maekawa T, Tobimatsu S, Inada N, Oribe N, Onitsuka T, Kanba S, Kamio Y (2011) Top-down and bottom-  
1028 up visual information processing of non-social stimuli in high-functioning autism spectrum  
1029 disorder. *Res Autism Spectr Disord* 5:201-209.
- 1030 Mahoney JR, Molholm S, Butler JS, Sehatpour P, Gomez-Ramirez M, Ritter W, Foxe JJ (2015) Keeping in  
1031 touch with the visual system: spatial alignment and multisensory integration of visual-  
1032 somatosensory inputs. *Front Psychol* 6:1068.
- 1033 Martineau J, Roux S, Adrien J, Garreau B, Barthélémy C, Lelord G (1992) Electrophysiological evidence of  
1034 different abilities to form cross-modal associations in children with autistic behavior.  
1035 *Electroencephalogr Clin Neurophysiol* 82:60-66.
- 1036 Megevand P, Mercier MR, Groppe DM, Golumbic EZ, Mesgarani N, Beauchamp MS, Schroeder CE, Mehta  
1037 AD (2018) Phase resetting in human auditory cortex to visual speech. *bioRxiv*:405597.
- 1038 Mégevand P, Molholm S, Nayak A, Foxe JJ (2013) Recalibration of the multisensory temporal window of  
1039 integration results from changing task demands. *PLoS One* 8:e71608.
- 1040 Meijers L, Eijkman E (1977) Distributions of simple RT with single and double stimuli. *Percept Psychophys*  
1041 22:41-48.
- 1042 Mercier MR, Foxe JJ, Fiebelkorn IC, Butler JS, Schwartz TH, Molholm S (2013) Auditory-driven phase reset  
1043 in visual cortex: human electrocorticography reveals mechanisms of early multisensory  
1044 integration. *Neuroimage* 79:19-29.
- 1045 Mercier MR, Molholm S, Fiebelkorn IC, Butler JS, Schwartz TH, Foxe JJ (2015) Neuro-Oscillatory Phase  
1046 Alignment Drives Speeded Multisensory Response Times: An Electro-Corticographic Investigation.  
1047 *The Journal of Neuroscience* 35:8546-8557.
- 1048 Miller J (1978) Multidimensional same–different judgments: Evidence against independent comparisons  
1049 of dimensions. *J Exp Psychol Hum Percept Perform* 4:411.
- 1050 Miller J (1982) Divided attention: Evidence for coactivation with redundant signals. *Cogn Psychol* 14:247-  
1051 279.
- 1052 Miller J (1986) Timecourse of coactivation in bimodal divided attention. *Percept Psychophys* 40:331-343.
- 1053 Miller J (1988) A warning about median reaction time. *J Exp Psychol Hum Percept Perform* 14:539.
- 1054 Miller J (1991) Reaction time analysis with outlier exclusion: Bias varies with sample size. *The quarterly*  
1055 *journal of experimental psychology* 43:907-912.
- 1056 Miller J (2016) Statistical facilitation and the redundant signals effect: What are race and coactivation  
1057 models? *Attention, Perception, & Psychophysics* 78:516-519.

- 1058 Molholm S, Ritter W, Murray MM, Javitt DC, Schroeder CE, Foxe JJ (2002) Multisensory auditory-visual  
1059 interactions during early sensory processing in humans: a high-density electrical mapping study.  
1060 *Cognitive Brain Research* 14:115-128.
- 1061 Mordkoff JT, Yantis S (1991) An interactive race model of divided attention. *J Exp Psychol Hum Percept*  
1062 *Perform* 17:520.
- 1063 Murphy JW, Foxe JJ, Peters JB, Molholm S (2014) Susceptibility to distraction in autism spectrum disorder:  
1064 Probing the integrity of oscillatory alpha-band suppression mechanisms. *Autism Res* 7:442-458.
- 1065 Murray MM, Molholm S, Michel CM, Heslenfeld DJ, Ritter W, Javitt DC, Schroeder CE, Foxe JJ (2004)  
1066 Grabbing your ear: rapid auditory–somatosensory multisensory interactions in low-level sensory  
1067 cortices are not constrained by stimulus alignment. *Cerebral cortex* 15:963-974.
- 1068 Nava E, Pavani F (2013) Changes in sensory dominance during childhood: Converging evidence from the  
1069 Colavita effect and the sound-induced flash illusion. *Child Dev* 84:604-616.
- 1070 Nidiffer AR, Stevenson RA, Fister JK, Barnett ZP, Wallace MT (2016) Interactions between space and  
1071 effectiveness in human multisensory performance. *Neuropsychologia* 88:83-91.
- 1072 Noorani I, Carpenter R (2016) The LATER model of reaction time and decision. *Neurosci Biobehav Rev*  
1073 64:229-251.
- 1074 Nozawa G, Reuter-Lorenz PA, Hughes H (1994) Parallel and serial processes in the human oculomotor  
1075 system: bimodal integration and express saccades. *Biol Cybern* 72:19-34.
- 1076 O'Connor N, Hermelin B (1965) Sensory dominance: In autistic imbecile children and controls. *Arch Gen*  
1077 *Psychiatry* 12:99-103.
- 1078 Otto TU (2018) An analysis and modelling toolbox to study multisensory response times. In: *International*  
1079 *Multisensory Research Forum*. Toronto, Canada.
- 1080 Otto TU, Mamassian P (2012) Noise and correlations in parallel perceptual decision making. *Curr Biol*  
1081 22:1391-1396.
- 1082 Otto TU, Mamassian P (2017) Multisensory decisions: the test of a race model, its logic, and power.  
1083 *Multisensory Research* 30:1-24.
- 1084 Otto TU, Dassy B, Mamassian P (2013) Principles of multisensory behavior. *J Neurosci* 33:7463-7474.
- 1085 Peelle JE (2019) The neural basis for auditory and audiovisual speech perception. *PsyArXiv*.
- 1086 Peelle JE, Sommers MS (2015) Prediction and constraint in audiovisual speech perception. *Cortex* 68:169-  
1087 181.
- 1088 Raab DH (1962) Division of psychology: Statistical facilitation of simple reaction times. *Trans N Y Acad Sci*  
1089 24:574-590.
- 1090 Ratcliff R (1979) Group reaction time distributions and an analysis of distribution statistics. *Psychol Bull*  
1091 86:446.
- 1092 Ratcliff R (1993) Methods for dealing with reaction time outliers. *Psychol Bull* 114:510.
- 1093 Robinson CW, Sloutsky VM (2004) Auditory dominance and its change in the course of development. *Child*  
1094 *Dev* 75:1387-1401.
- 1095 Ross LA, Saint-Amour D, Leavitt VM, Javitt DC, Foxe JJ (2007) Do you see what I am saying? Exploring visual  
1096 enhancement of speech comprehension in noisy environment. *Cerebral Cortex* 17:1147-1153.
- 1097 Ross LA, Molholm S, Blanco D, Gomez-Ramirez M, Saint-Amour D, Foxe JJ (2011) The development of  
1098 multisensory speech perception continues into the late childhood years. *Eur J Neurosci* 33:2329-  
1099 2337.
- 1100 Schroeder CE, Lakatos P, Kajikawa Y, Partan S, Puce A (2008) Neuronal oscillations and visual amplification  
1101 of speech. *Trends Cogn Sci* 12:106-113.
- 1102 Senkowski D, Saint-Amour D, Höfle M, Foxe JJ (2011) Multisensory interactions in early evoked brain  
1103 activity follow the principle of inverse effectiveness. *Neuroimage* 56:2200-2208.
- 1104 Shaw L, Crosse MJ, Nicholas E, Muhan Chen A, Braiman M, Shoari A, Freedman EG, Molholm S, Foxe JJ  
1105 (2019) Evidence for Modality Switch Costs in Redundant Signals Effect Paradigms.

- 1106 Silverman LB, Bennetto L, Campana E, Tanenhaus MK (2010) Speech-and-gesture integration in high  
1107 functioning autism. *Cognition* 115:380-393.
- 1108 Sinnott S, Soto-Faraco S, Spence C (2008) The co-occurrence of multisensory competition and facilitation.  
1109 *Acta Psychol (Amst)* 128:153-161.
- 1110 Smith EG, Bennetto L (2007) Audiovisual speech integration and lipreading in autism. *Journal of Child*  
1111 *Psychology and Psychiatry* 48:813-821.
- 1112 Spence C, Nicholls ME, Driver J (2001) The cost of expecting events in the wrong sensory modality. *Percept*  
1113 *Psychophys* 63:330-336.
- 1114 Stano J (1999) Wechsler abbreviated scale of intelligence. San Antonio, TX: The Psychological Corporation.
- 1115 Stein BE, Stanford TR, Rowland BA (2014) Development of multisensory integration from the perspective  
1116 of the individual neuron. *Nature Reviews Neuroscience* 15:520-535.
- 1117 Stevenson RA, Bushmakina M, Kim S, Wallace MT, Puce A, James TW (2012) Inverse effectiveness and  
1118 multisensory interactions in visual event-related potentials with audiovisual speech. *Brain Topogr*  
1119 25:308-326.
- 1120 Stevenson RA, Segers M, Ncube BL, Black KR, Bebkos JM, Ferber S, Barense MD (2017) The cascading  
1121 influence of multisensory processing on speech perception in autism.  
1122 *Autism:1362361317704413*.
- 1123 Sumbly WH, Pollack I (1954) Visual contribution to speech intelligibility in noise. *J Acoust Soc Am* 26:212-  
1124 215.
- 1125 Sutton S, Hakerem G, Zubin J, Portnoy M (1961) The effect of shift of sensory modality on serial reaction-  
1126 time: A comparison of schizophrenics and normals. *The American Journal of Psychology* 74:224-  
1127 232.
- 1128 Taylor N, Isaac C, Milne E (2010) A comparison of the development of audiovisual integration in children  
1129 with autism spectrum disorders and typically developing children. *J Autism Dev Disord* 40:1403-  
1130 1411.
- 1131 Todd JW (1912) Reaction to multiple stimuli: Science Press.
- 1132 Townsend JT, Wenger MJ (2004) A theory of interactive parallel processing: new capacity measures and  
1133 predictions for a response time inequality series. *Psychol Rev* 111:1003.
- 1134 Tye-Murray N, Sommers M, Spehar B (2007) Auditory and visual lexical neighborhoods in audiovisual  
1135 speech perception. *Trends in Amplification* 11:233-241.
- 1136 Ulrich R, Miller J (1994) Effects of truncation on reaction time analysis. *J Exp Psychol Gen* 123:34.
- 1137 Ulrich R, Miller J, Schröter H (2007) Testing the race model inequality: an algorithm and computer  
1138 programs. *Behav Res Methods* 39:291-302.
- 1139 Van der Stoep N, Van der Stigchel S, Nijboer T (2015a) Exogenous spatial attention decreases audiovisual  
1140 integration. *Attention, perception, & psychophysics* 77:464-482.
- 1141 Van der Stoep N, Spence C, Nijboer T, Van der Stigchel S (2015b) On the relative contributions of  
1142 multisensory integration and crossmodal exogenous spatial attention to multisensory response  
1143 enhancement. *Acta Psychol (Amst)* 162:20-28.
- 1144 Van Rijsbergen CJ (1979) Information Retrieval: Butterworth-Heinemann.
- 1145 Vasa RA, Mostofsky SH, Ewen JB (2016) The disrupted connectivity hypothesis of autism spectrum  
1146 disorders: time for the next phase in research. *Biological Psychiatry: Cognitive Neuroscience and*  
1147 *Neuroimaging* 1:245-252.
- 1148 Vincent SB (1912) The function of the vibrissae in the behavior of the white rat (*Animal Behavior*  
1149 *Monographs Vol. 1, No. 5*). New York, NY: H Holt.
- 1150 Wager TD, Davidson ML, Hughes BL, Lindquist MA, Ochsner KN (2008) Prefrontal-subcortical pathways  
1151 mediating successful emotion regulation. *Neuron* 59:1037-1050.
- 1152 Wallace MT, Stein BE (2007) Early experience determines how the senses will interact. *J Neurophysiol*  
1153 97:921-926.

- 1154 Wallace MT, Wilkinson LK, Stein BE (1996) Representation and integration of multiple sensory inputs in  
1155 primate superior colliculus. *J Neurophysiol* 76:1246-1266.
- 1156 Wallace MT, Perrault TJ, Hairston WD, Stein BE (2004) Visual experience is necessary for the development  
1157 of multisensory integration. *J Neurosci* 24:9580-9584.
- 1158 Westfall PH, Young SS (1993) *Resampling-Based Multiple Testing: Examples and Methods for p-Value*  
1159 *Adjustment (Wiley Series in Probability and Statistics)*.
- 1160 Williams DL, Goldstein G, Minshew NJ (2013) The modality shift experiment in adults and children with  
1161 high functioning autism. *J Autism Dev Disord* 43:794-806.
- 1162 Wundt WM (1893) *Grundzüge der physiologischen Psychologie*, 4 Edition. Leipzig: W. Engelmann.
- 1163 Zeng K, Kang J, Ouyang G, Li J, Han J, Wang Y, Sokhadze EM, Casanova MF, Li X (2017) Disrupted Brain  
1164 Network in Children with Autism Spectrum Disorder. *Sci Rep* 7:16253.
- 1165 Zubin J (1975) Problem of attention in schizophrenia. *Experimental approaches to psychopathology*:139-  
1166 166.
- 1167
